# Supplementary material for: Discovery of novel drug-like antitubercular hits targeting the MEP pathway enzyme DXPS by strategic application of ligand-based virtual screening
Source: Royal Society of Chemistry journal article supplement (doi:10.1039/d2sc02371g), 2022-01-01
Supplement: d2sc02371g3.pdf [file d2sc02371g3.pdf]

## Supplementary Spectra

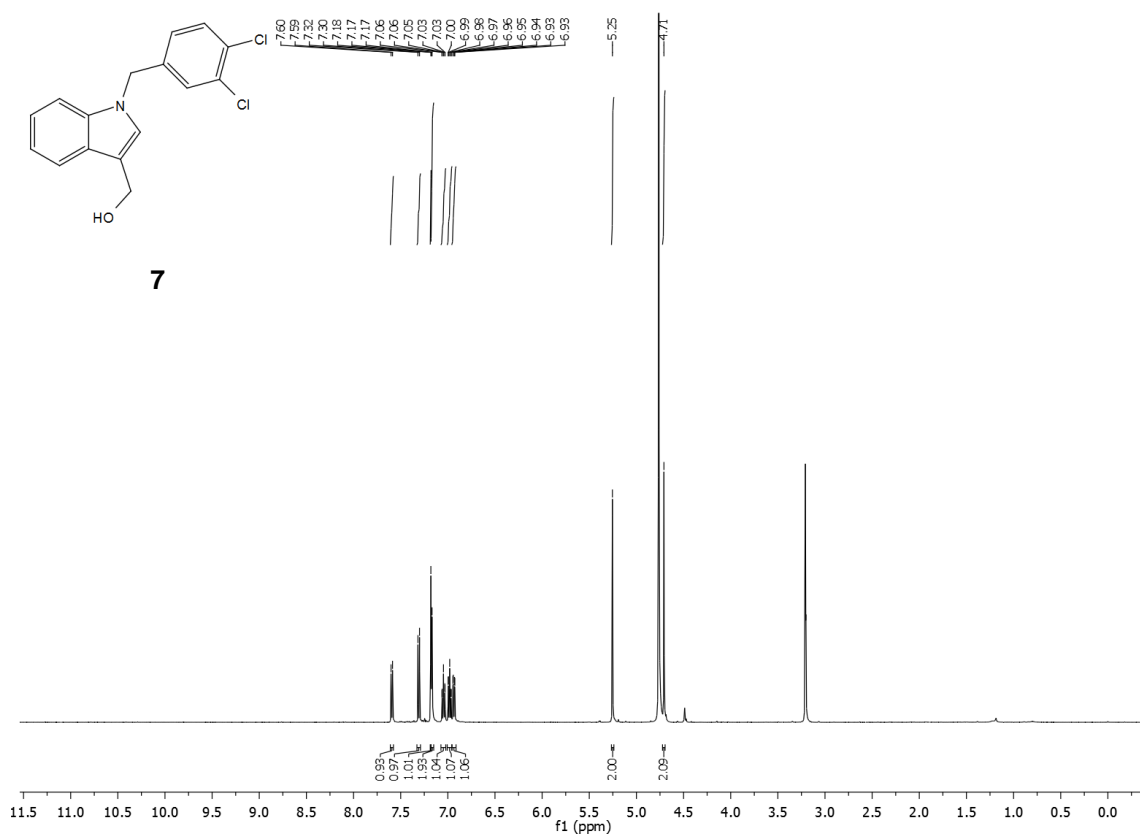

**Spectrum 1:** <sup>1</sup>H NMR of indole **7**.

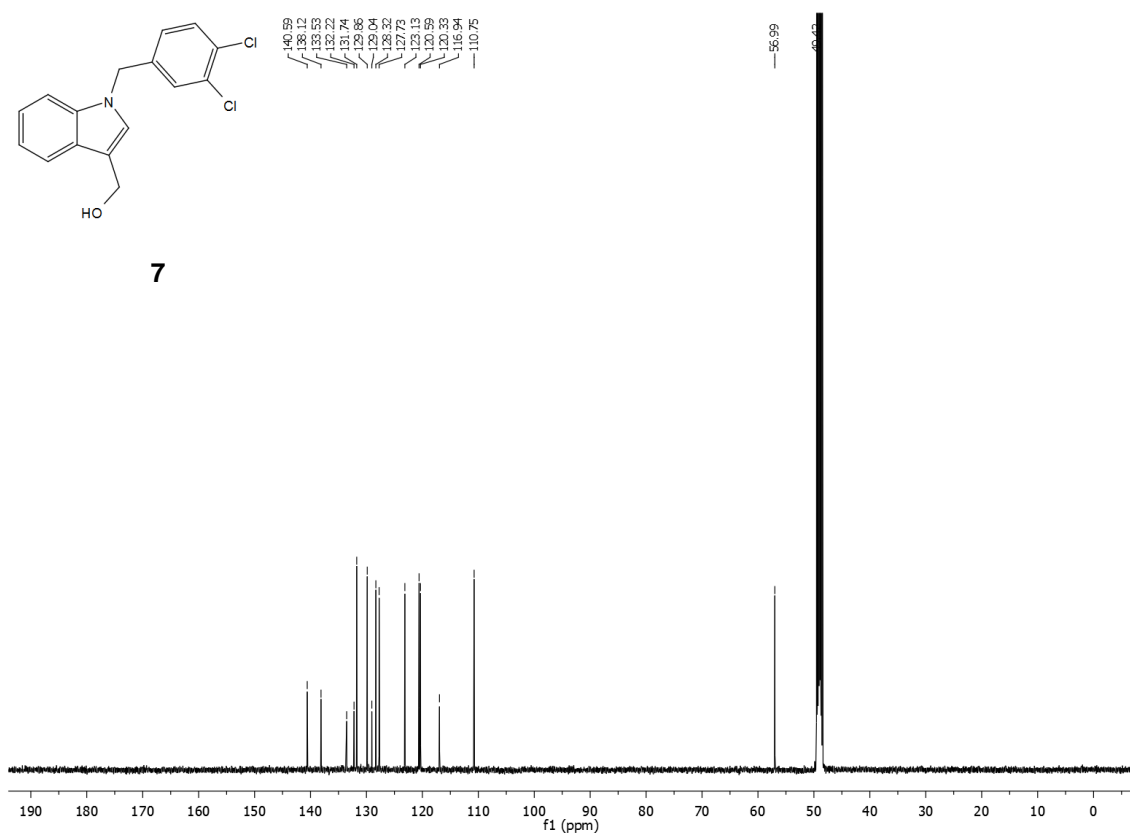

**Spectrum 2:** <sup>13</sup>C NMR of indole **7**.

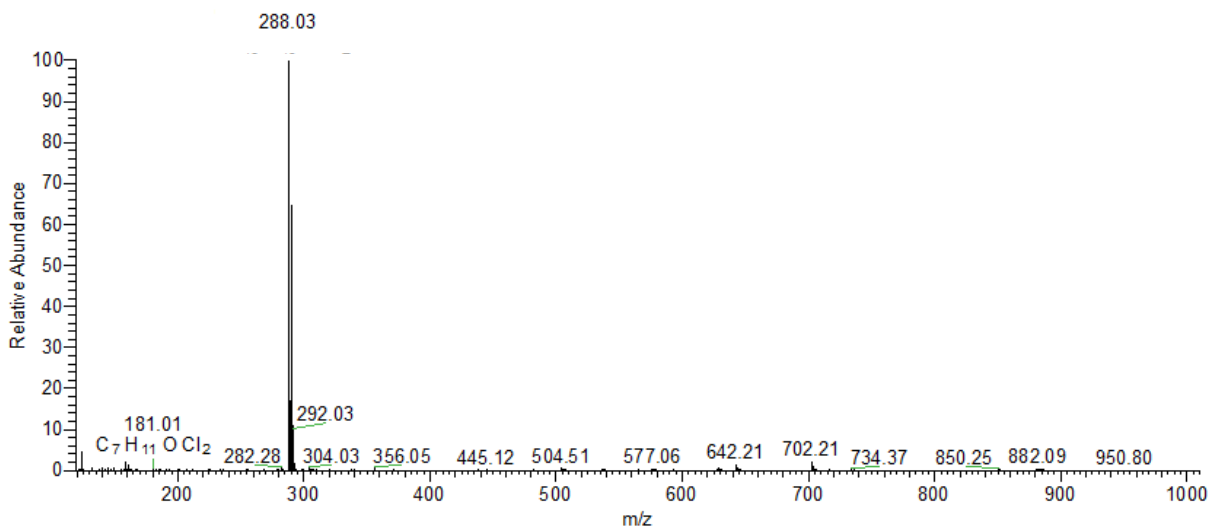

**Spectrum 3:** HR-ESI-MS spectrum of indole 7.

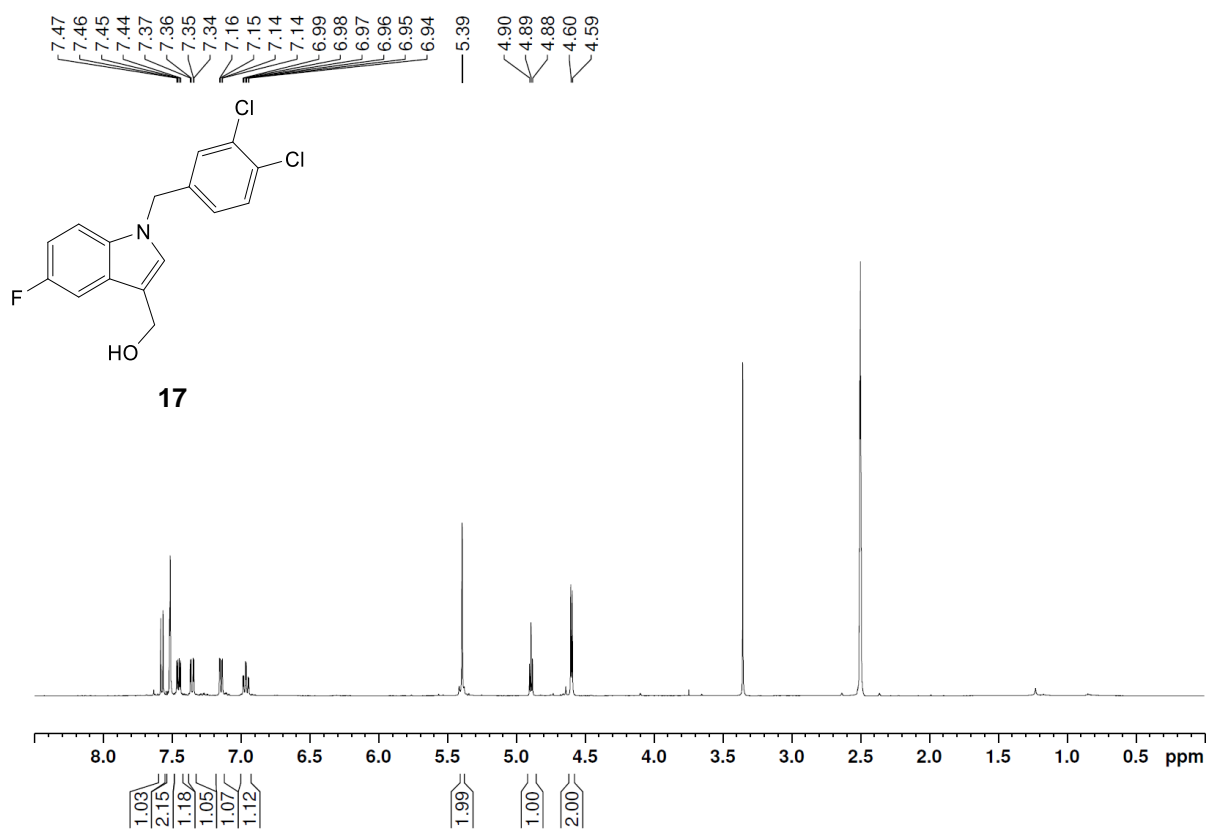

**Spectrum 4:**  $^1H$  NMR of indole 17.

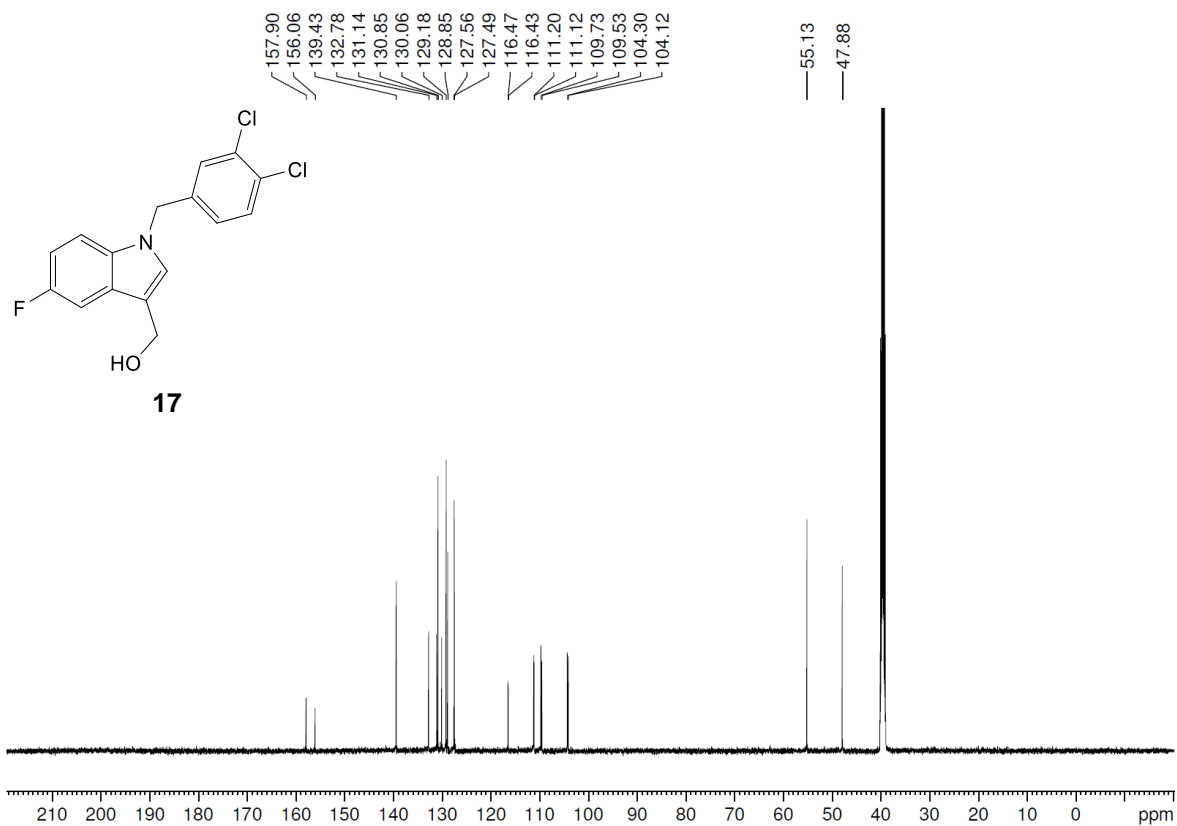

**Spectrum 5:**  $^{13}\text{C}$  NMR of indole **17**.

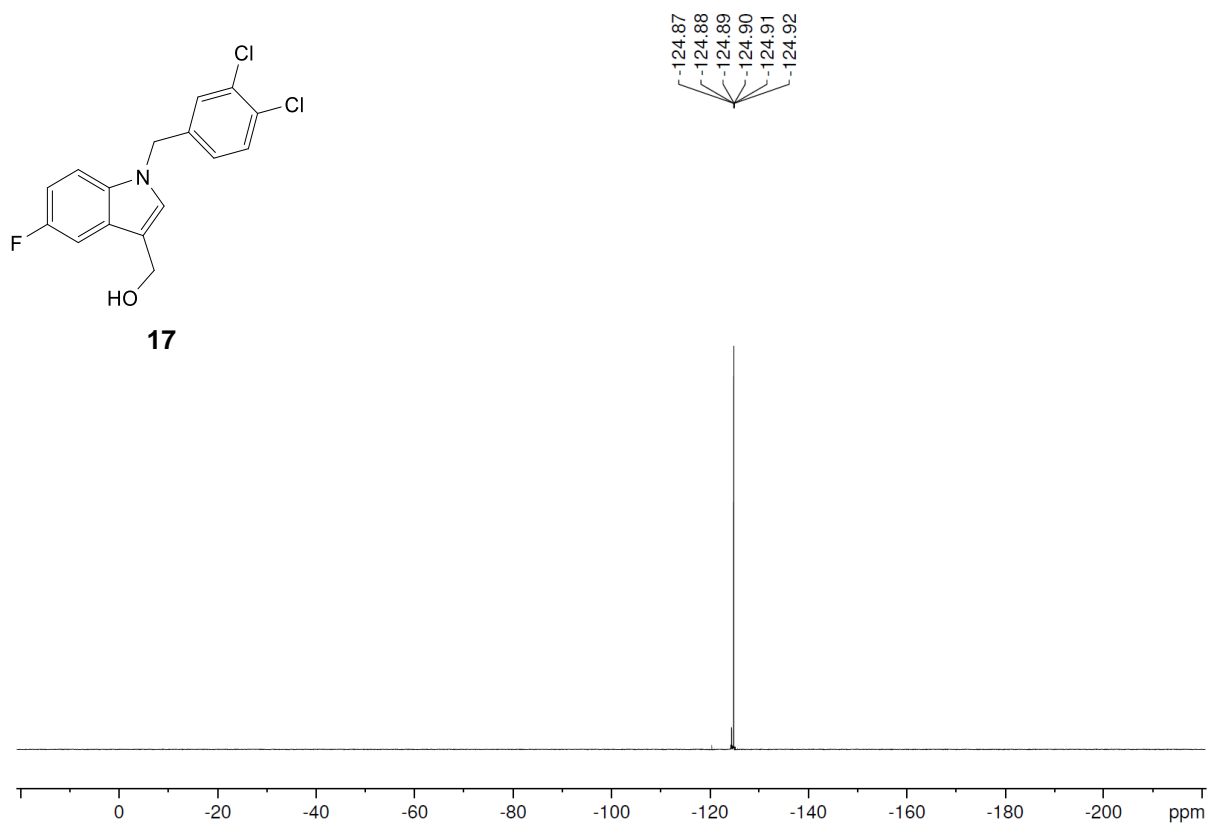

**Spectrum 6:**  $^{19}\text{F}$  NMR of indole **17**.

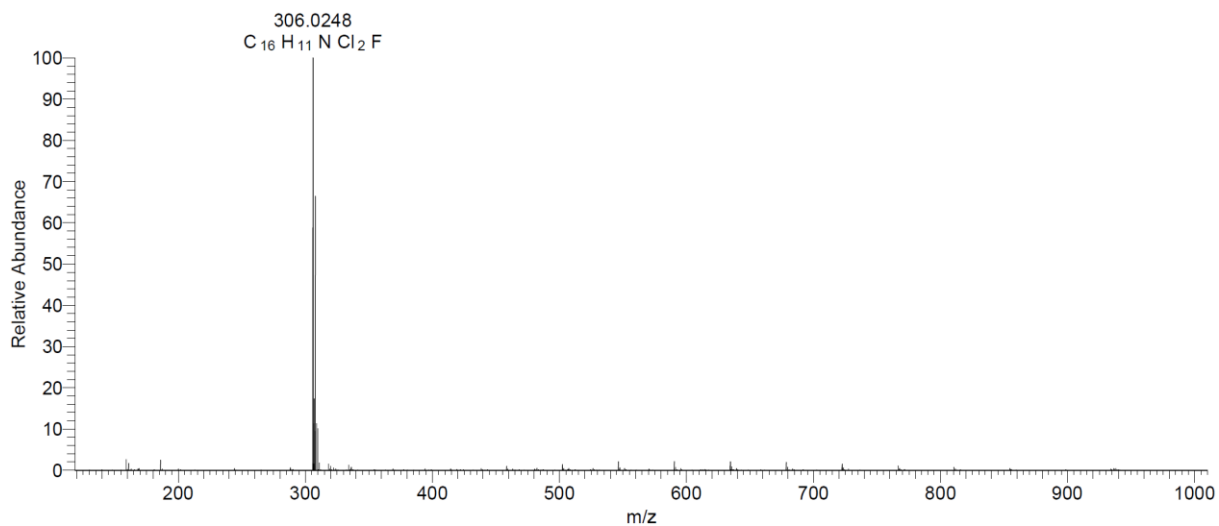

**Spectrum 7:** HR-ESI-MS spectrum of indole **17**.

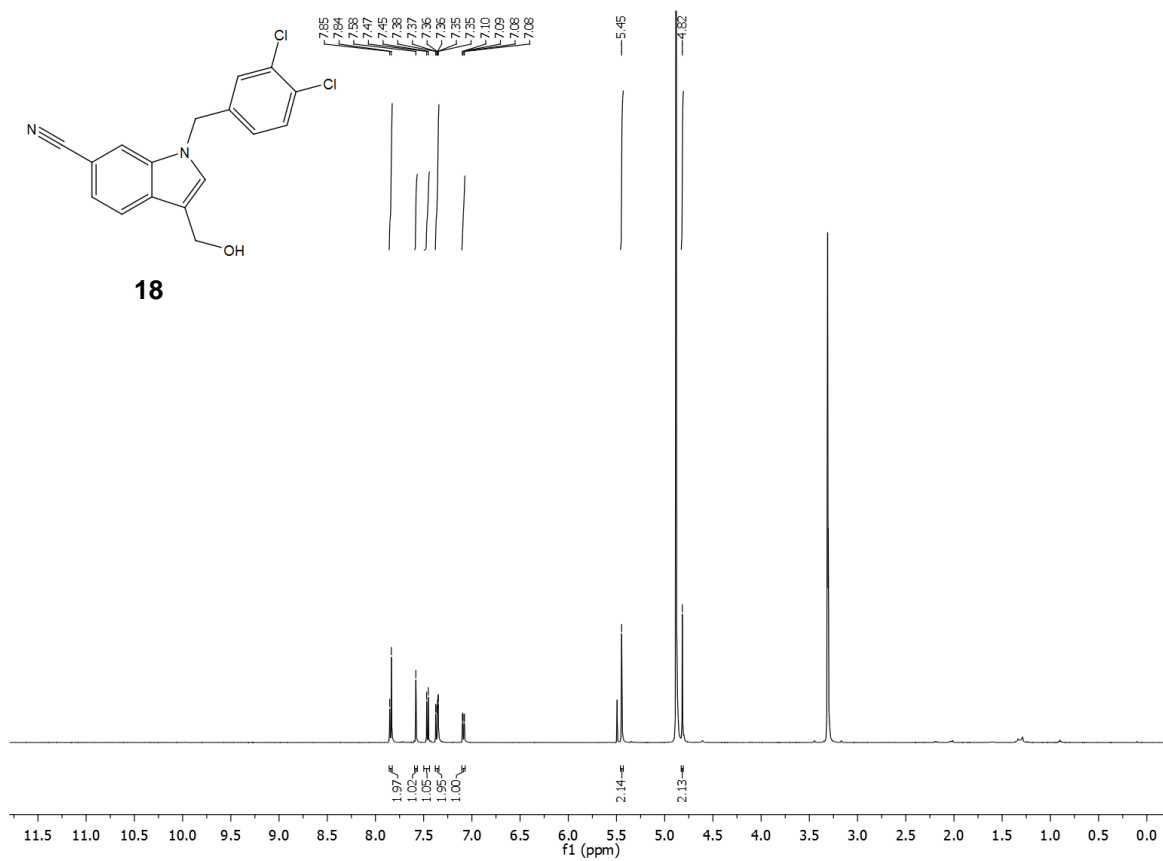

**Spectrum 8:** <sup>1</sup>H NMR of indole **18**.

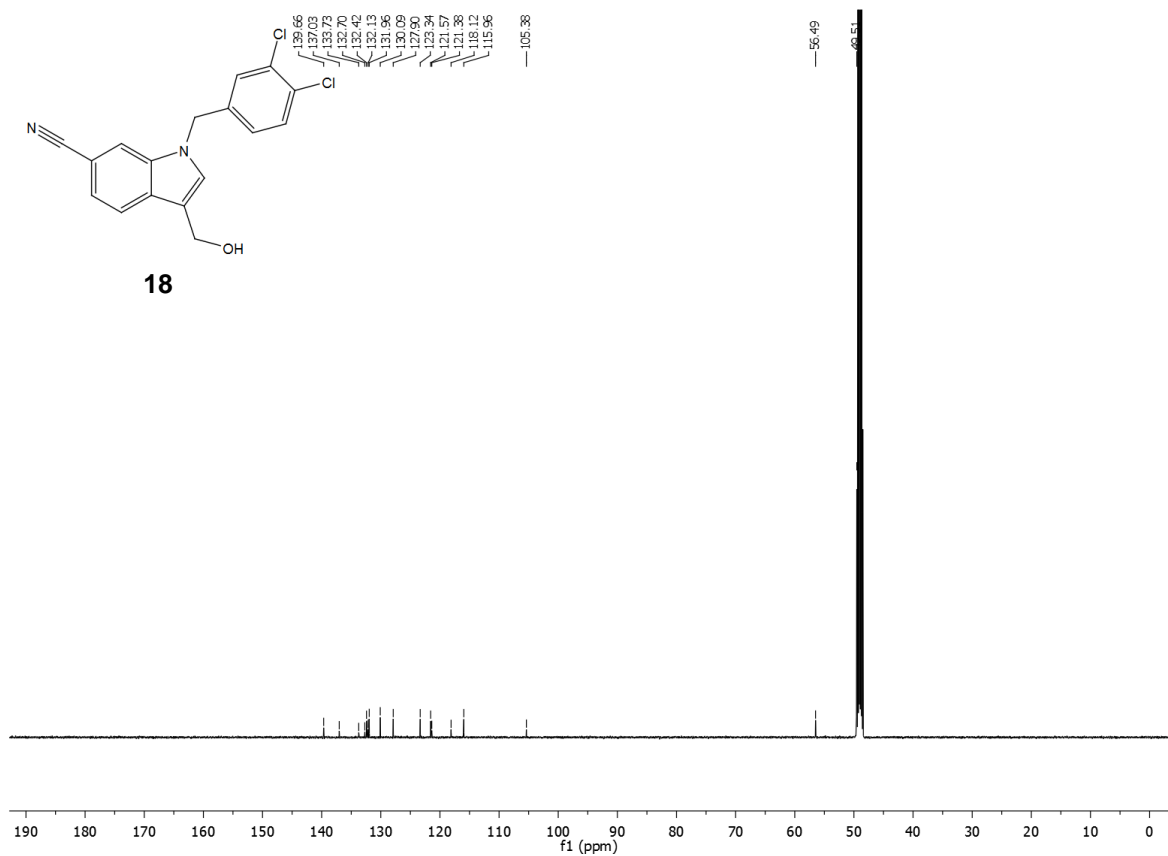

Spectrum 9:  $^{13}\text{C}$  NMR of indole 18.

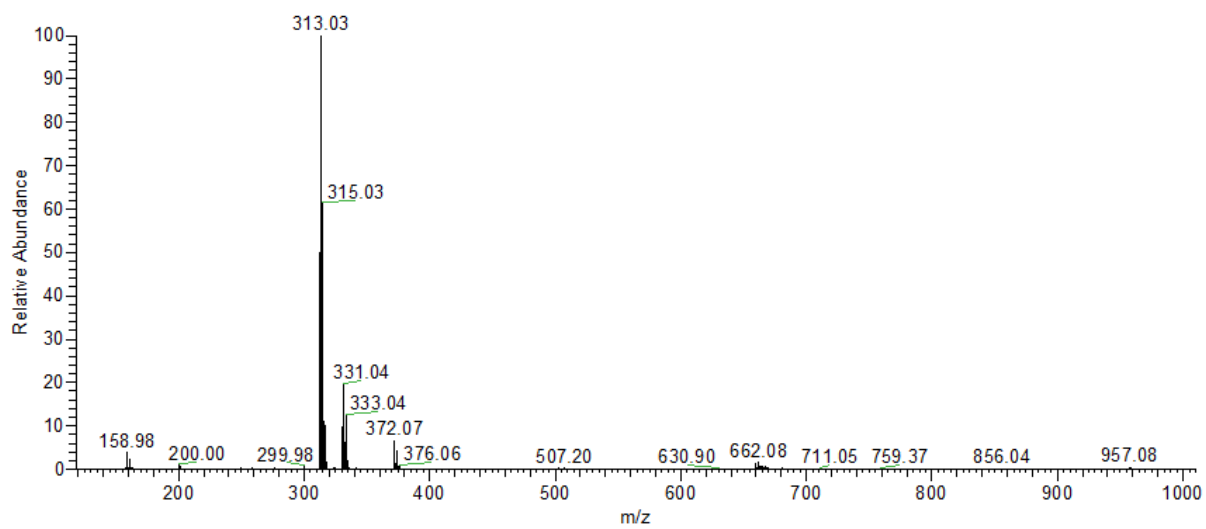

Spectrum 10: HR-ESI-MS spectrum of indole 18.

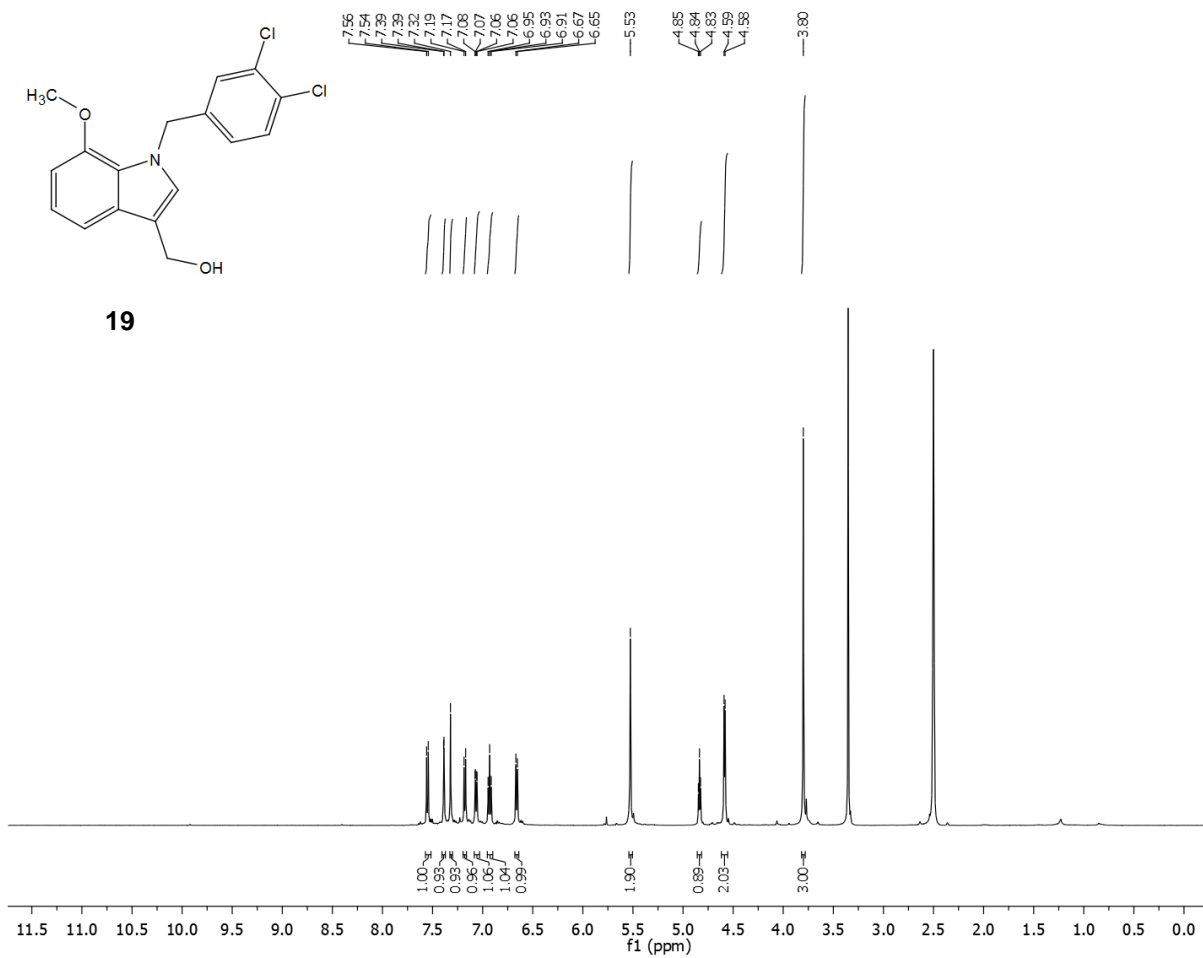

**Spectrum 11:**  $^1\text{H}$  NMR of indole **19**.

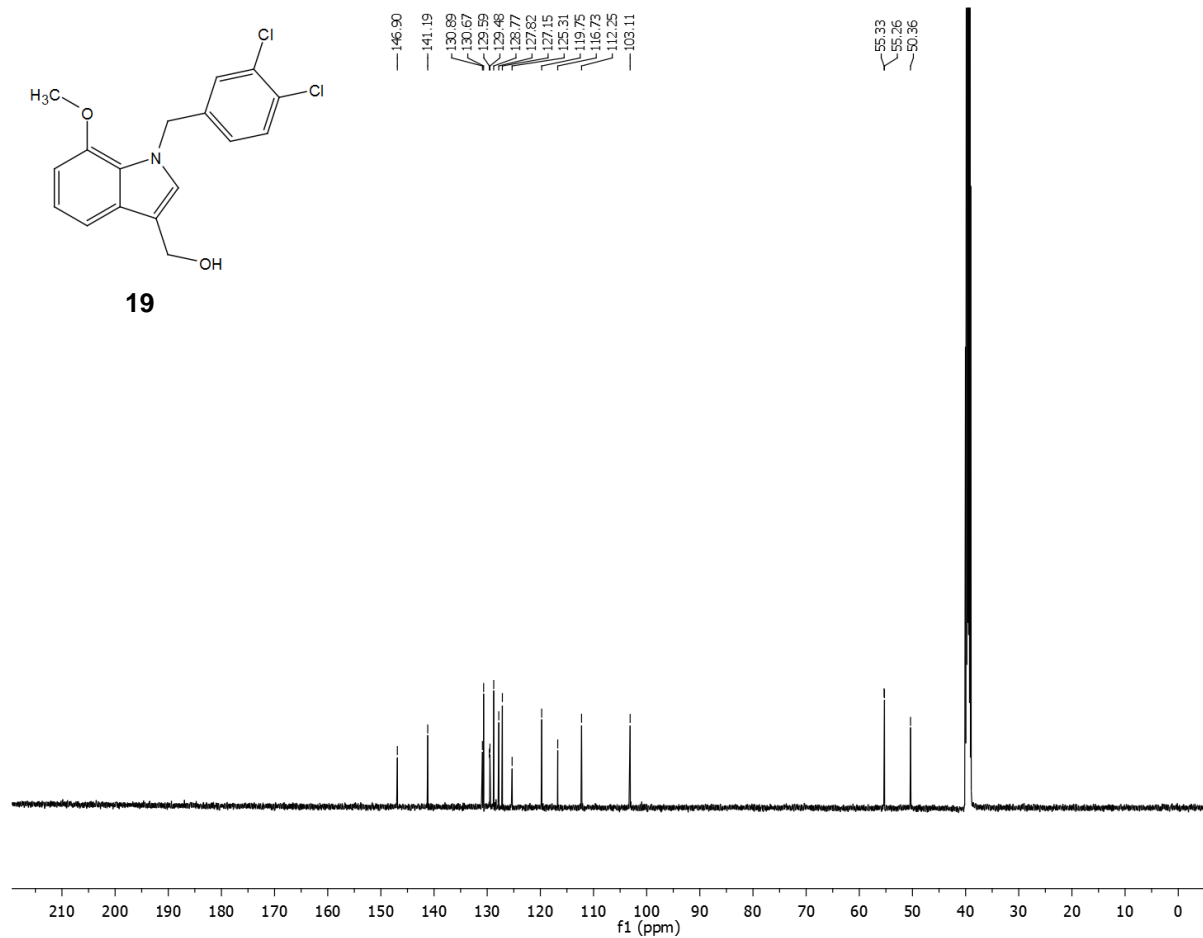

**Spectrum 12:** <sup>13</sup>C NMR of indole **19**.

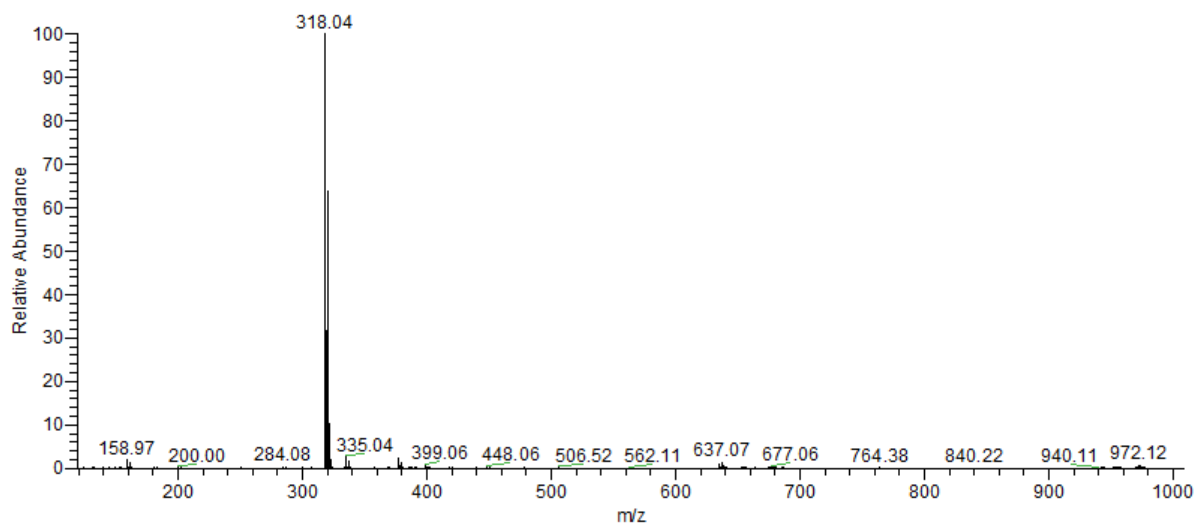

**Spectrum 13:** HR-ESI-MS spectrum of indole **19**.

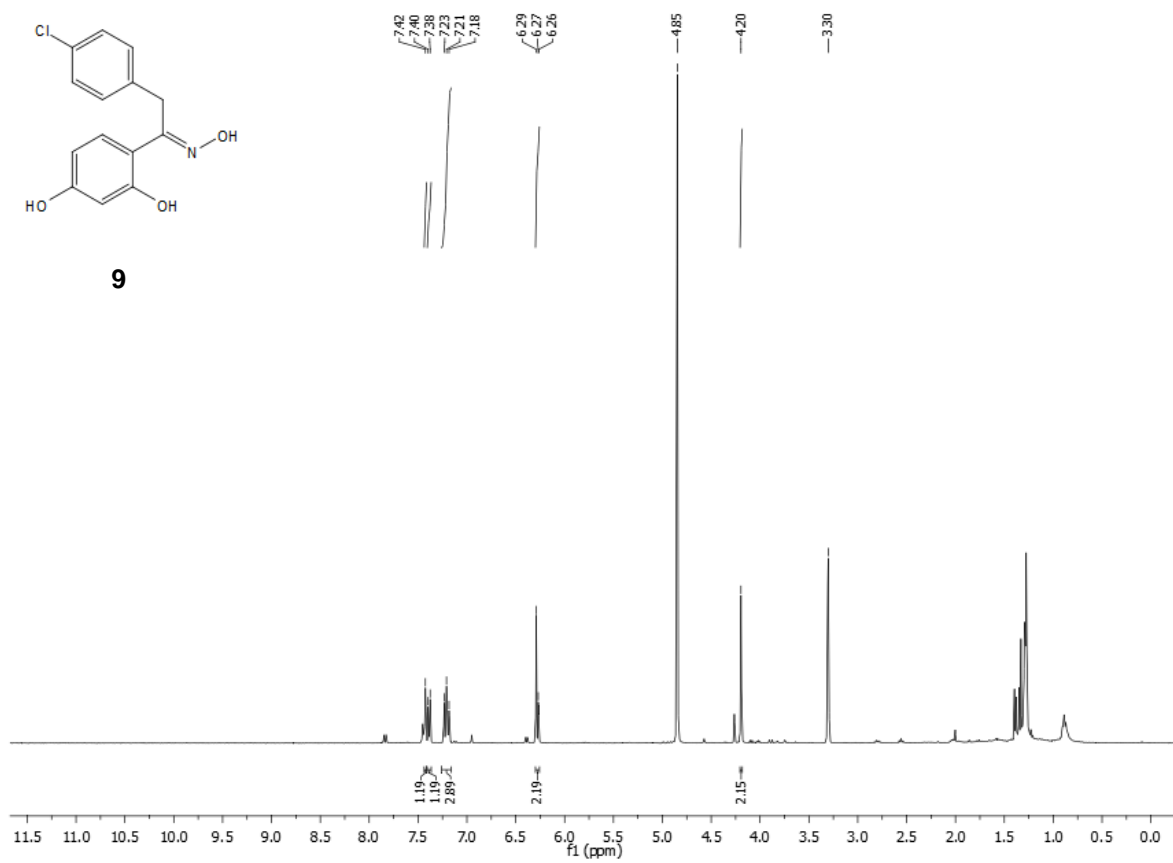

**Spectrum 14:** <sup>1</sup>H NMR of oxime 9.

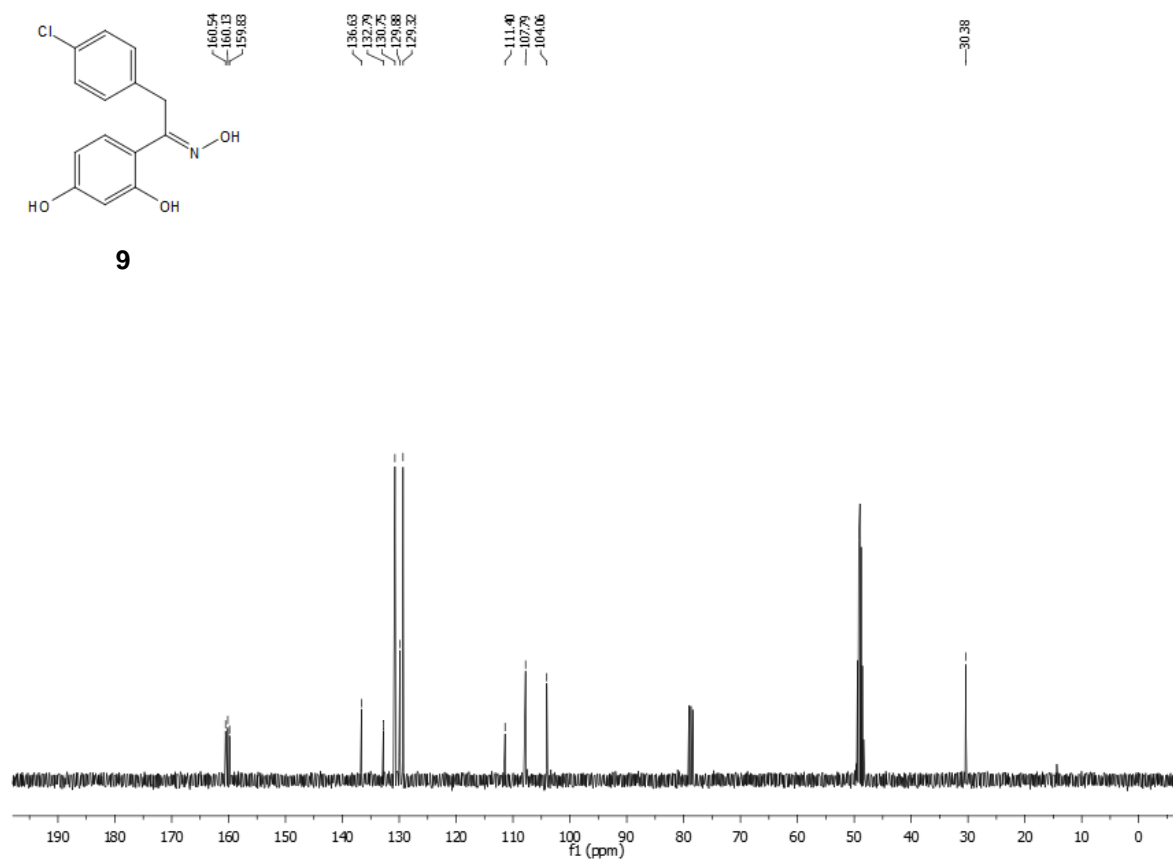

**Spectrum 15:** <sup>13</sup>C NMR of oxime 9.



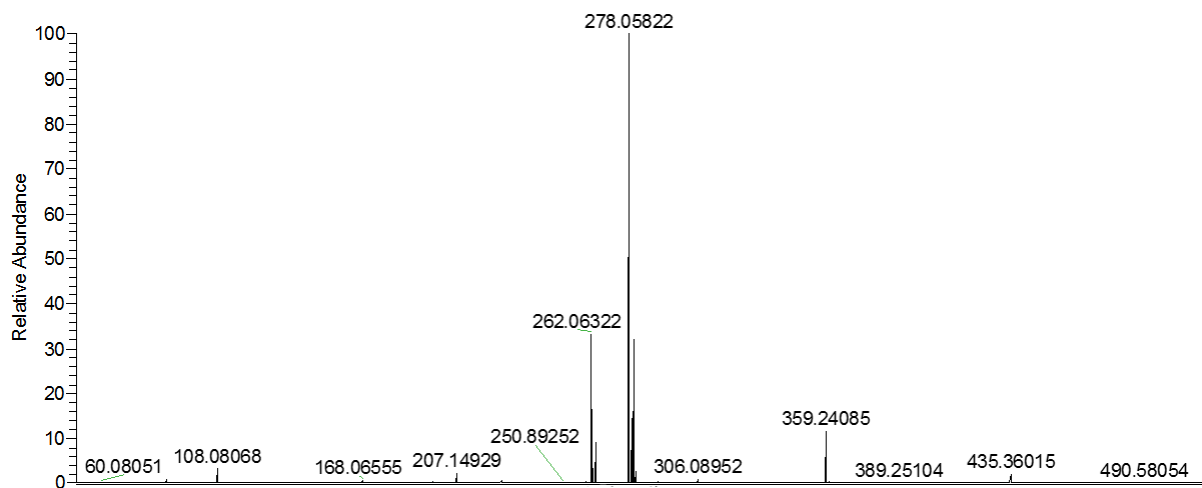

**Spectrum 16:** HR-ESI-MS spectrum of oxime **9**.

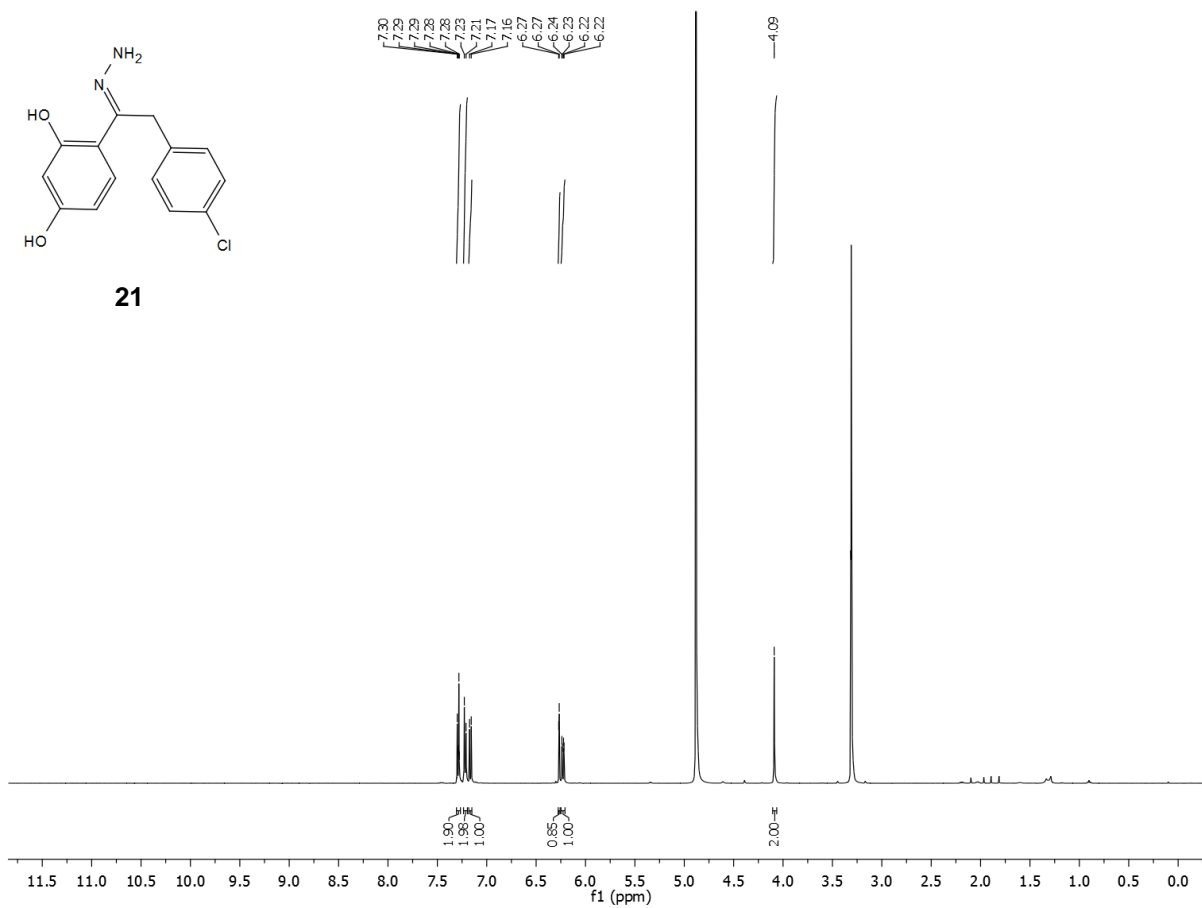

**Spectrum 17:**  $^1\text{H}$  NMR of oxime **21**.

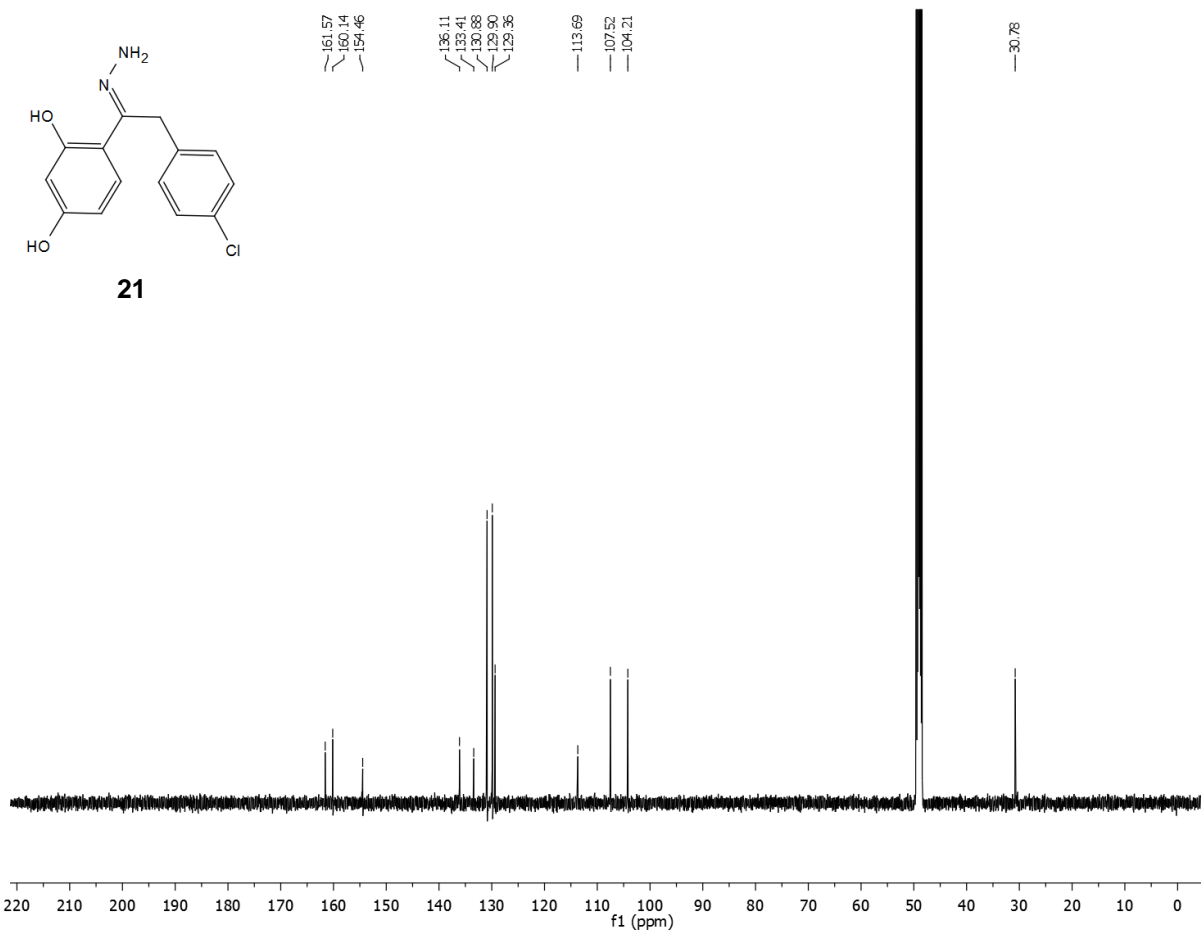

**Spectrum 18:**  $^{13}\text{C}$  NMR of oxime **21**.

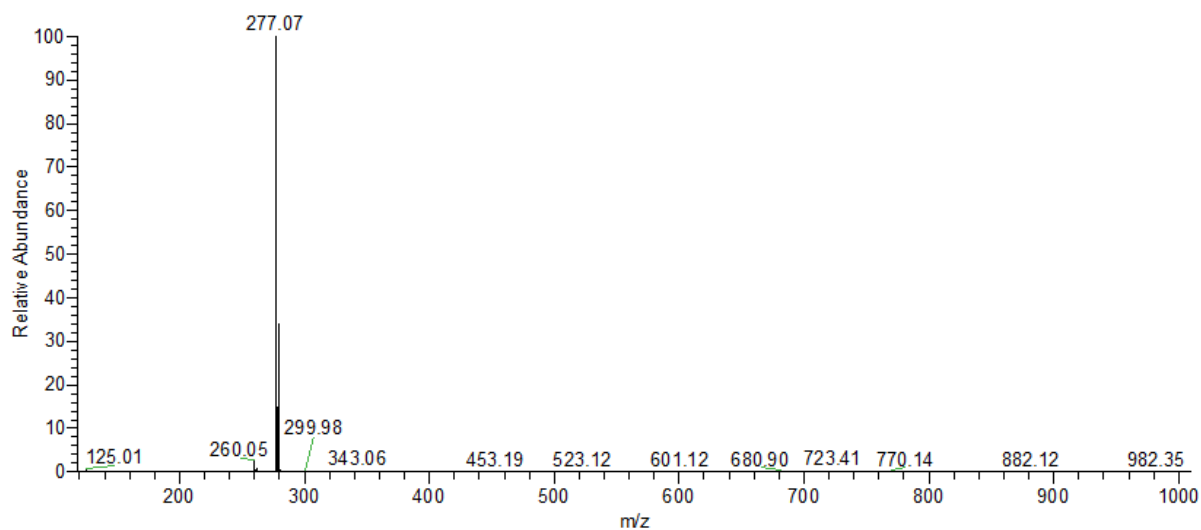

**Spectrum 19:** HR-ESI-MS spectrum of oxime **21**.

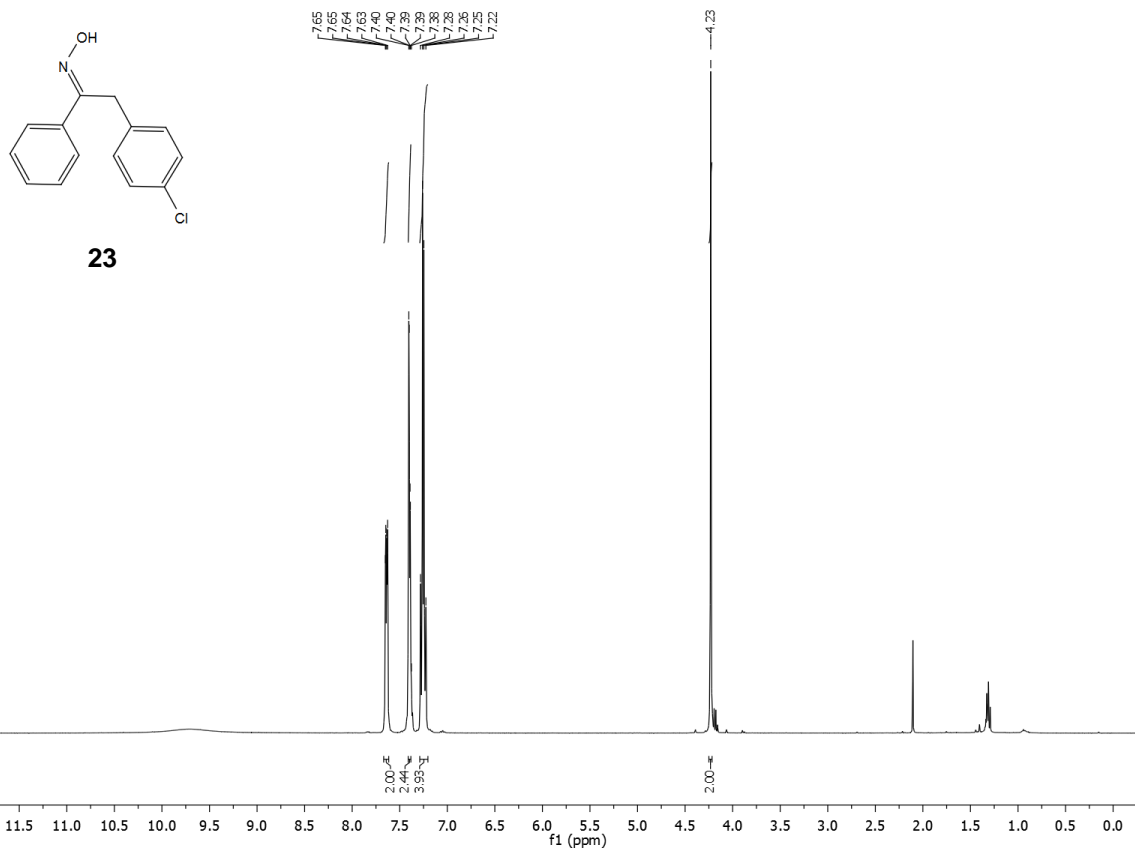

**Spectrum 20:** <sup>1</sup>H NMR of oxime **23**.

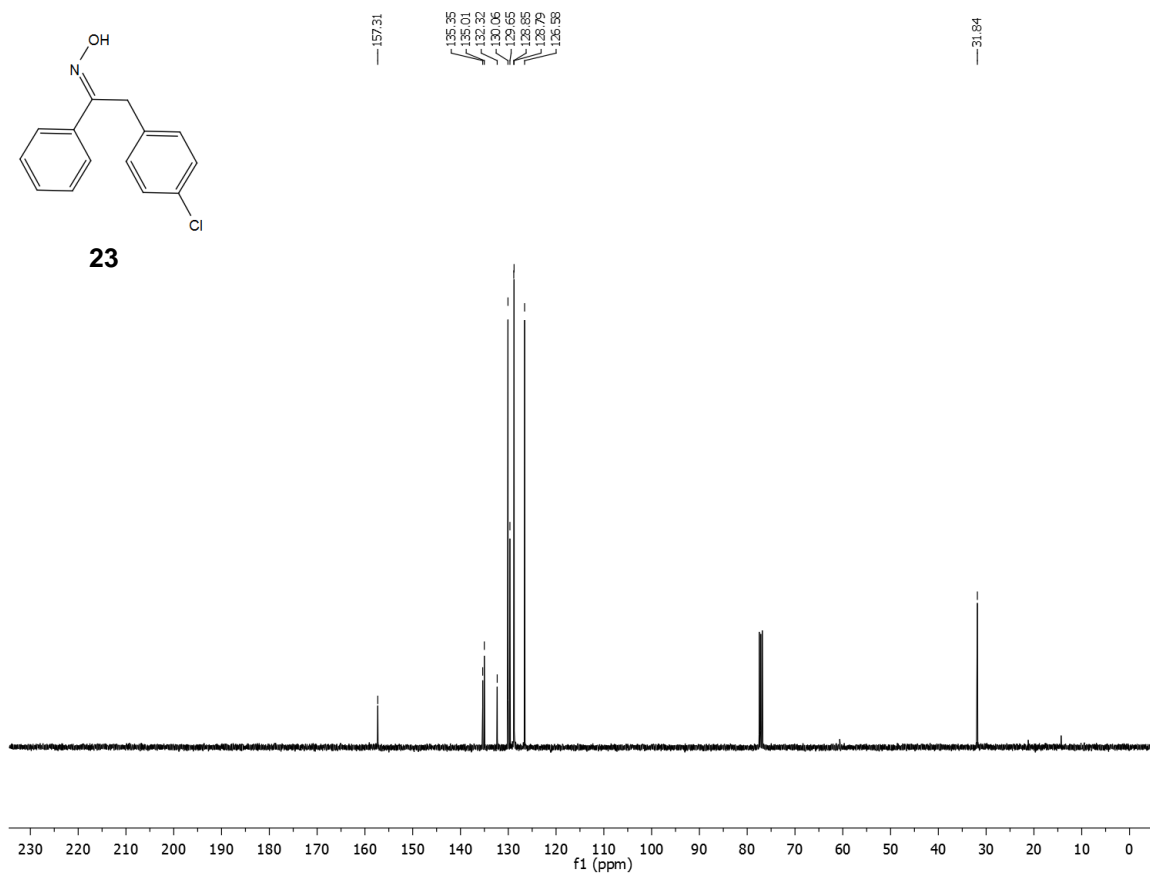

**Spectrum 21:** <sup>13</sup>C NMR of oxime **23**.

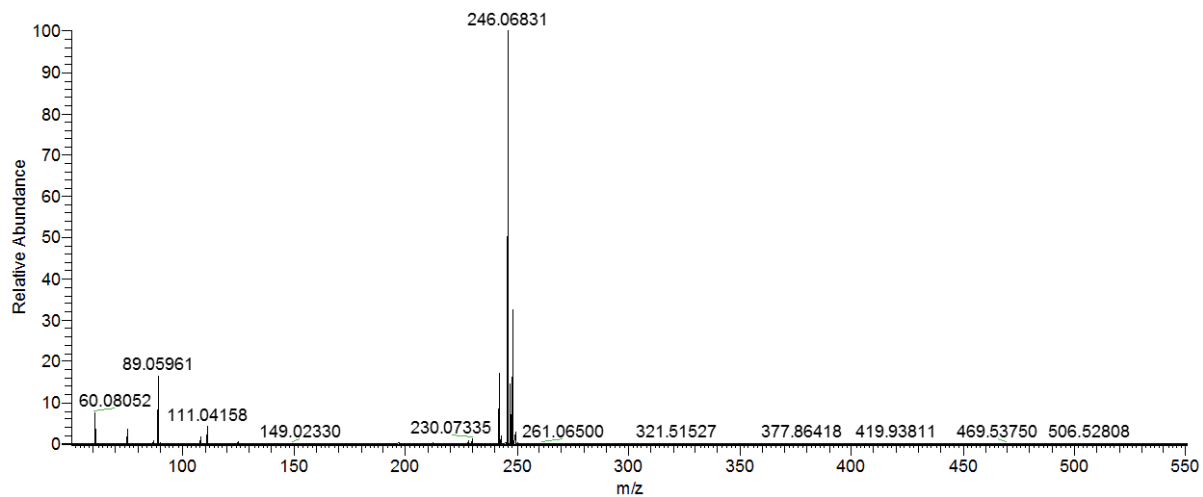

**Spectrum 22:** HR-ESI-MS spectrum of oxime **23**.

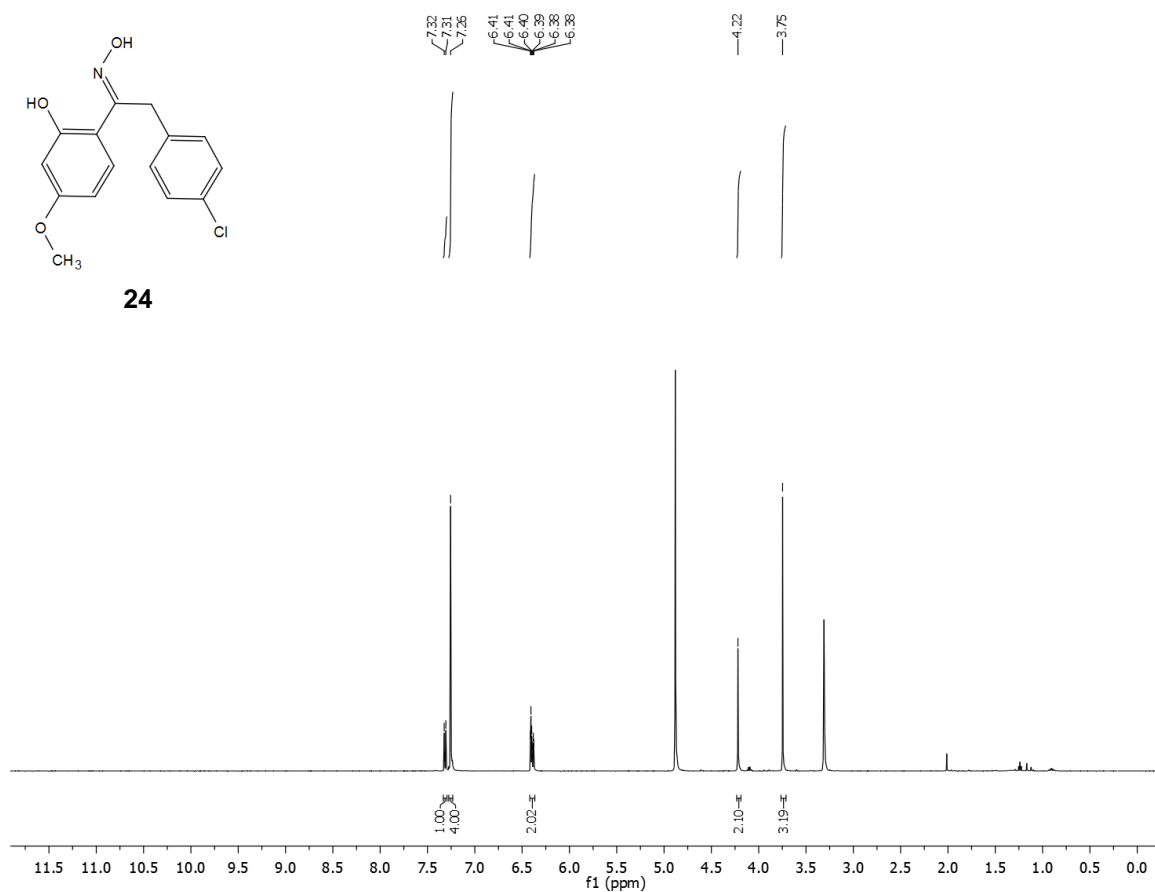

**Spectrum 23:** <sup>1</sup>H NMR of oxime **24**.

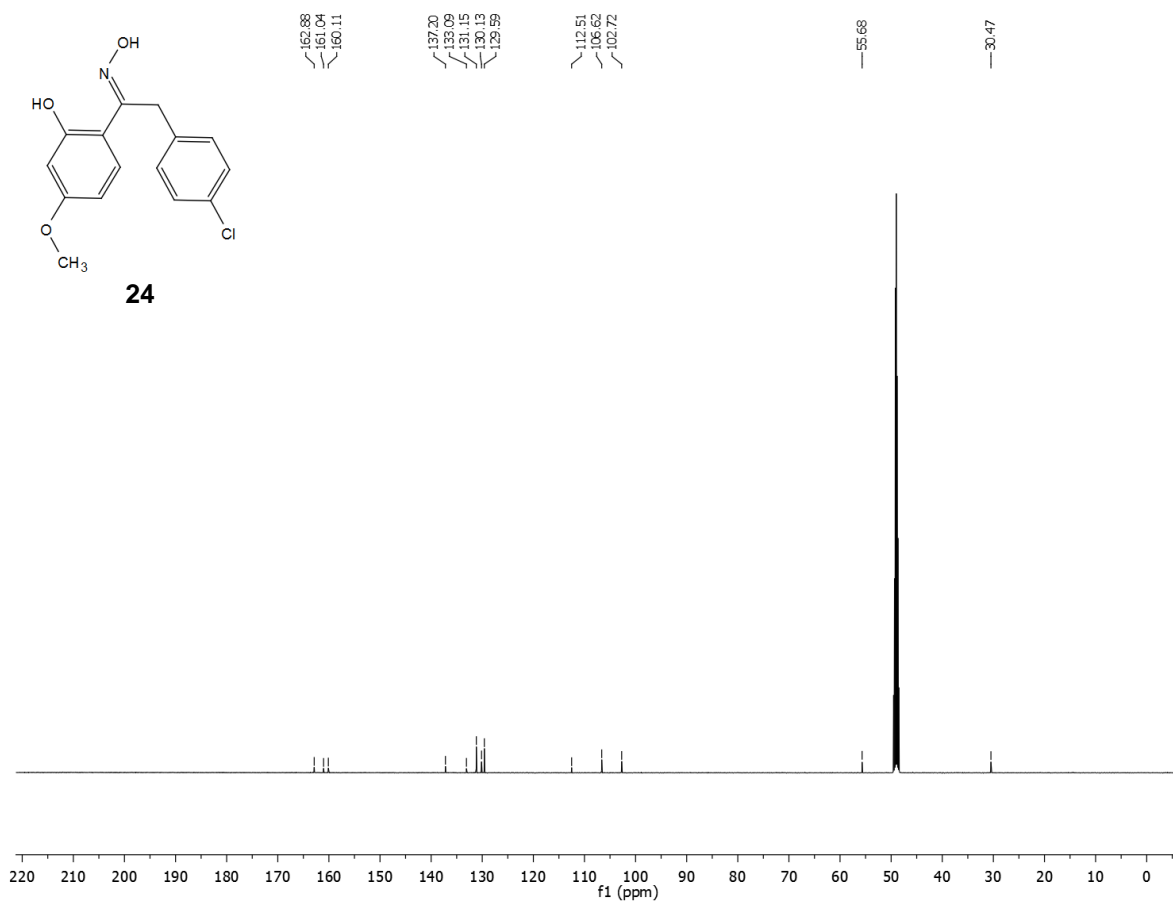

**Spectrum 24:**  $^{13}\text{C}$  NMR of oxime **24**.

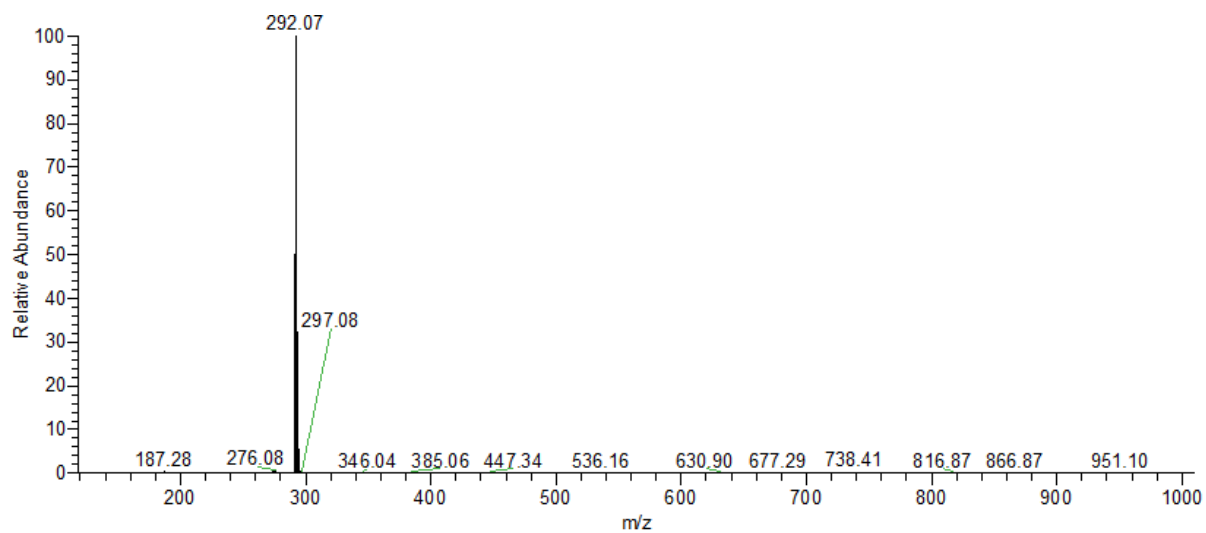

**Spectrum 25:** HR-ESI-MS spectrum of oxime **24**.

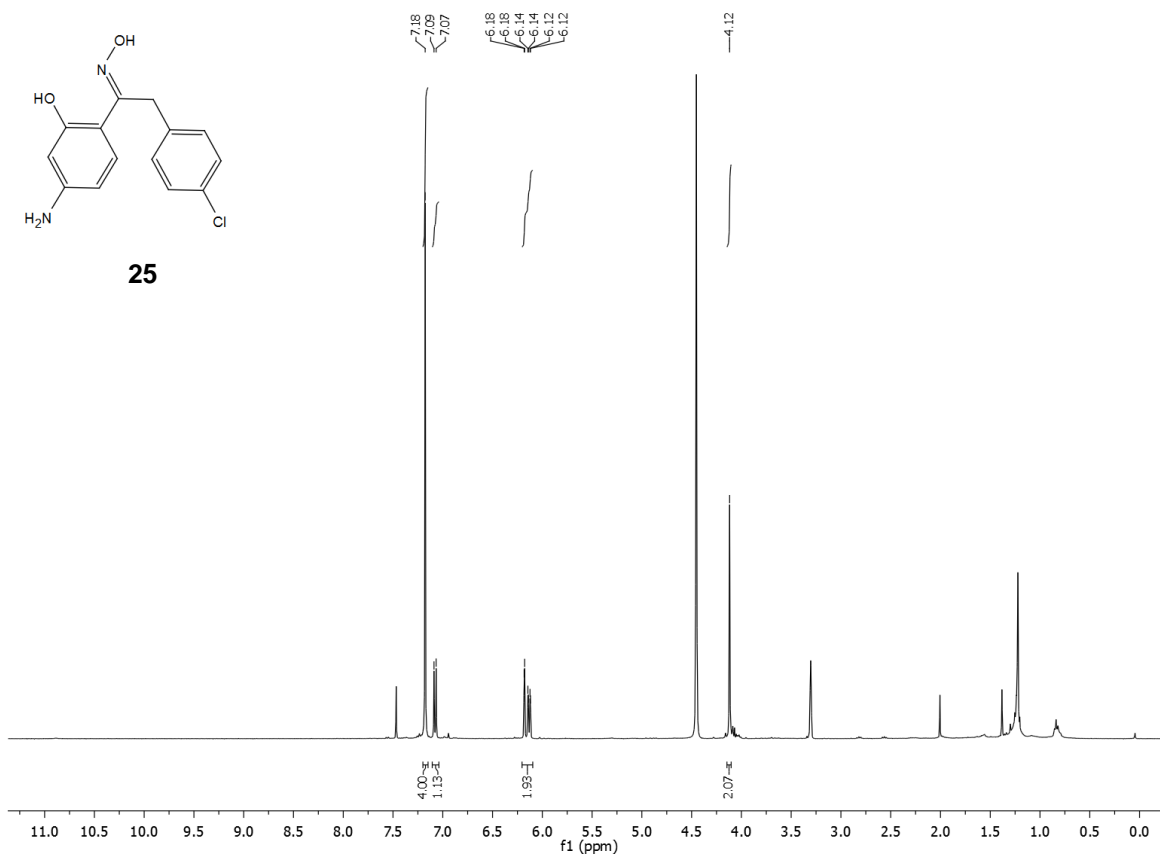

**Spectrum 26:** <sup>1</sup>H NMR of oxime **25**.

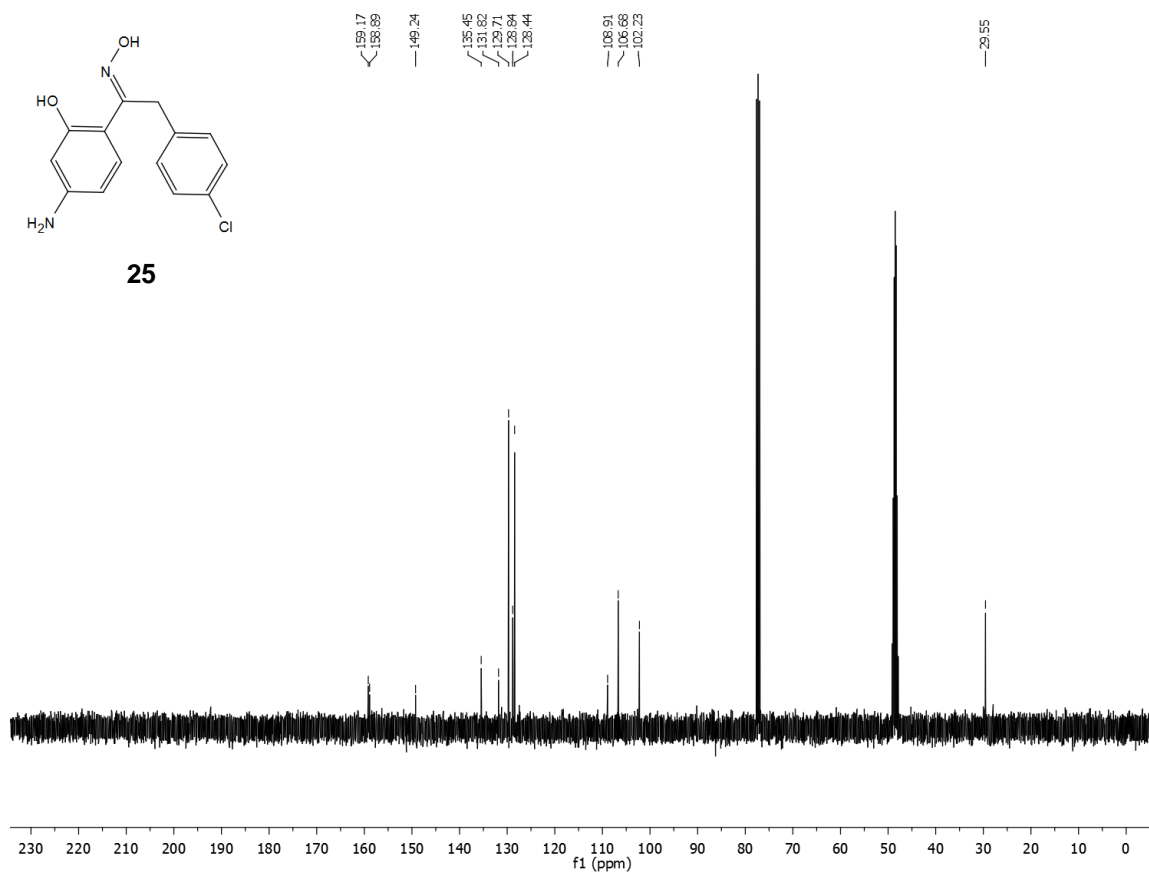

**Spectrum 27:** <sup>13</sup>C NMR of oxime **25**.

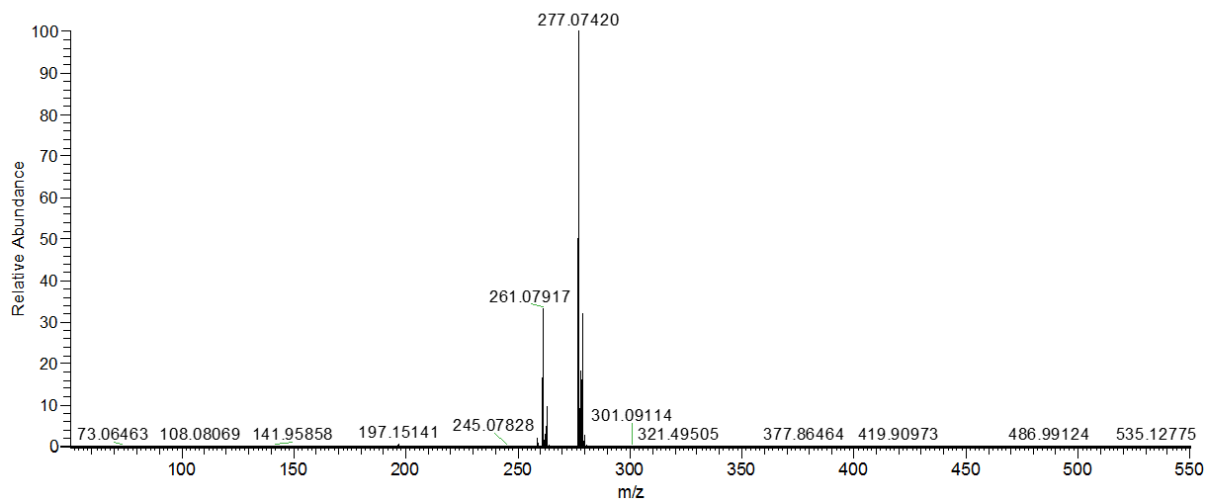

**Spectrum 28:** HR-ESI-MS spectrum of oxime **25**.

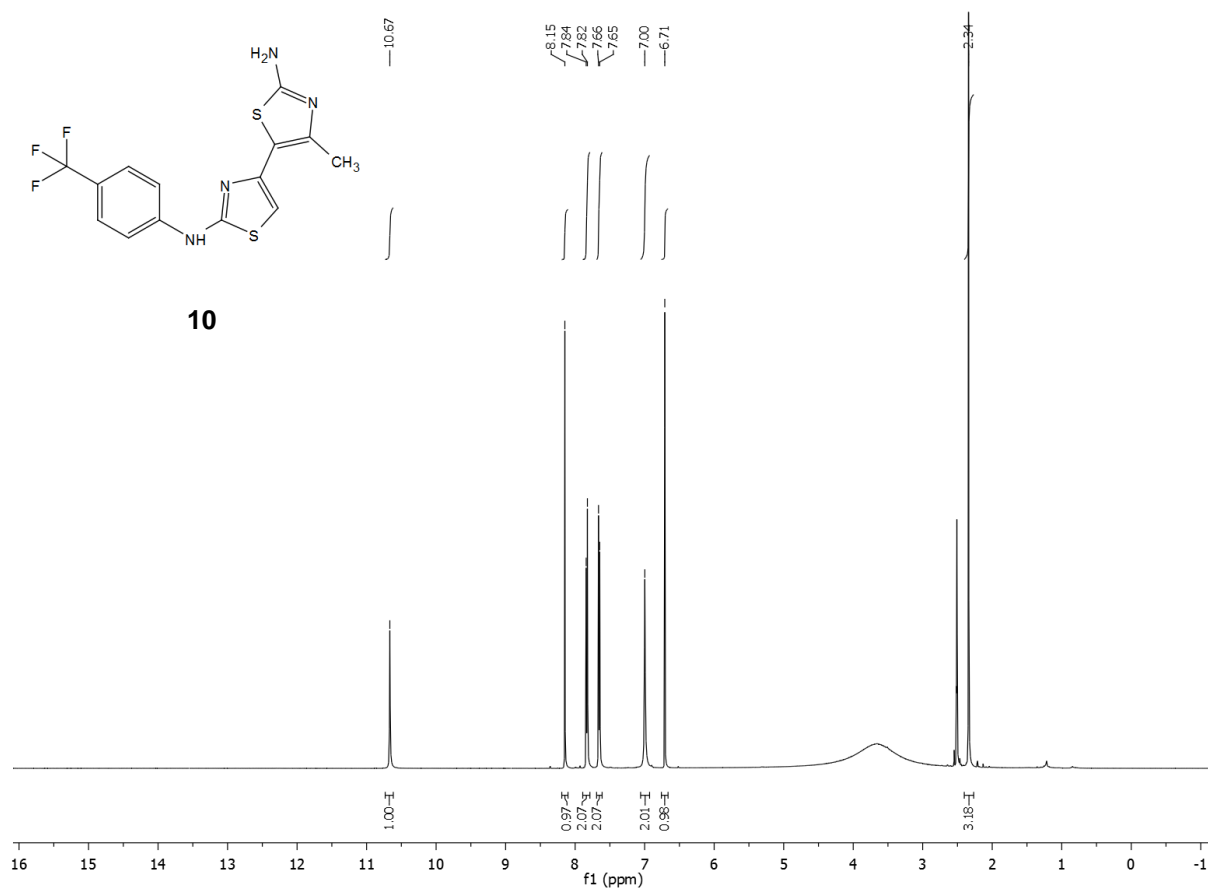

**Spectrum 29:** <sup>1</sup>H NMR of aminothiazole **10**.

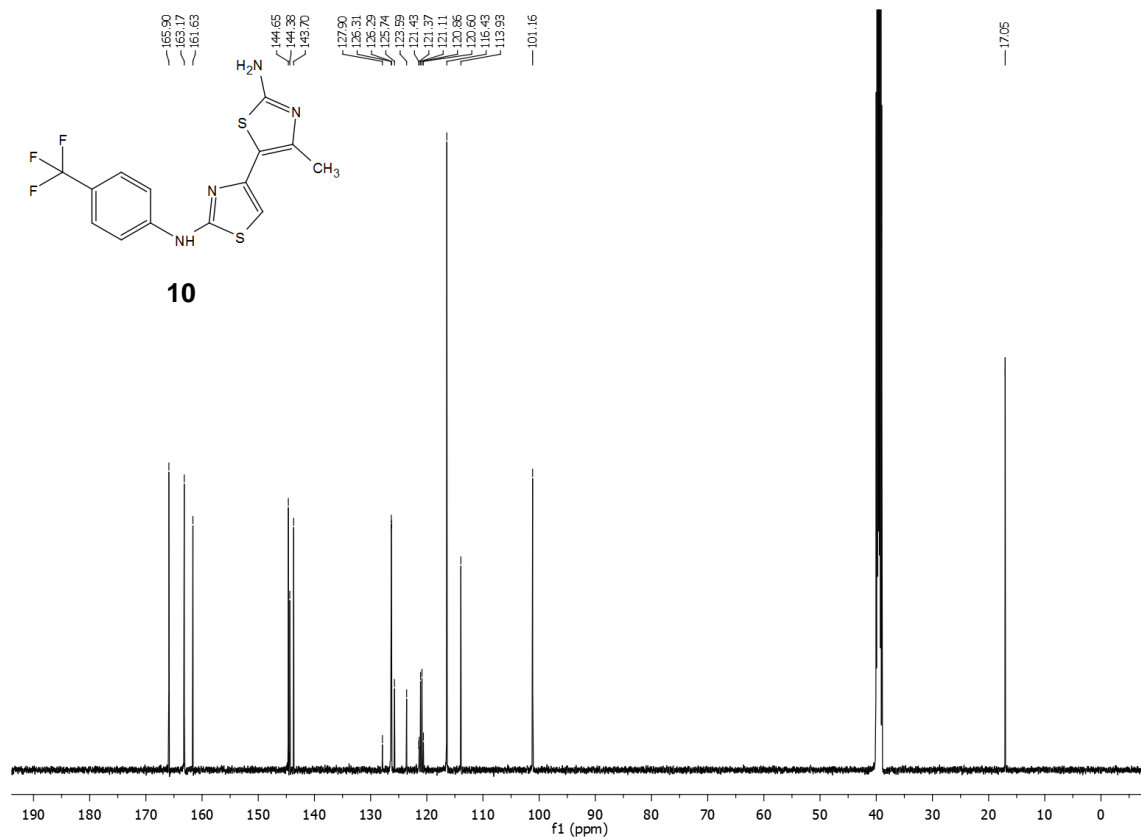

**Spectrum 30:**  $^{13}\text{C}$  NMR of aminothiazole **10**.

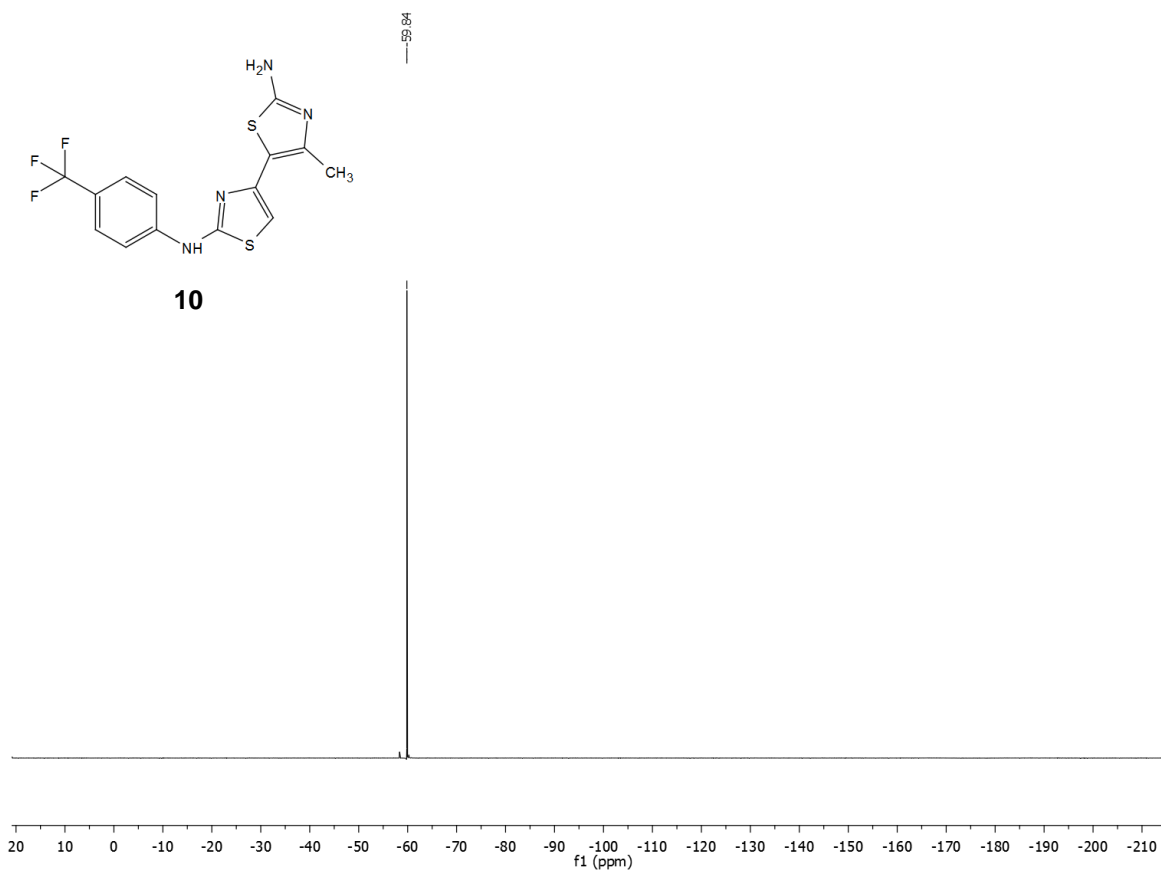

**Spectrum 31:**  $^{19}\text{F}$  NMR of aminothiazole **10**.



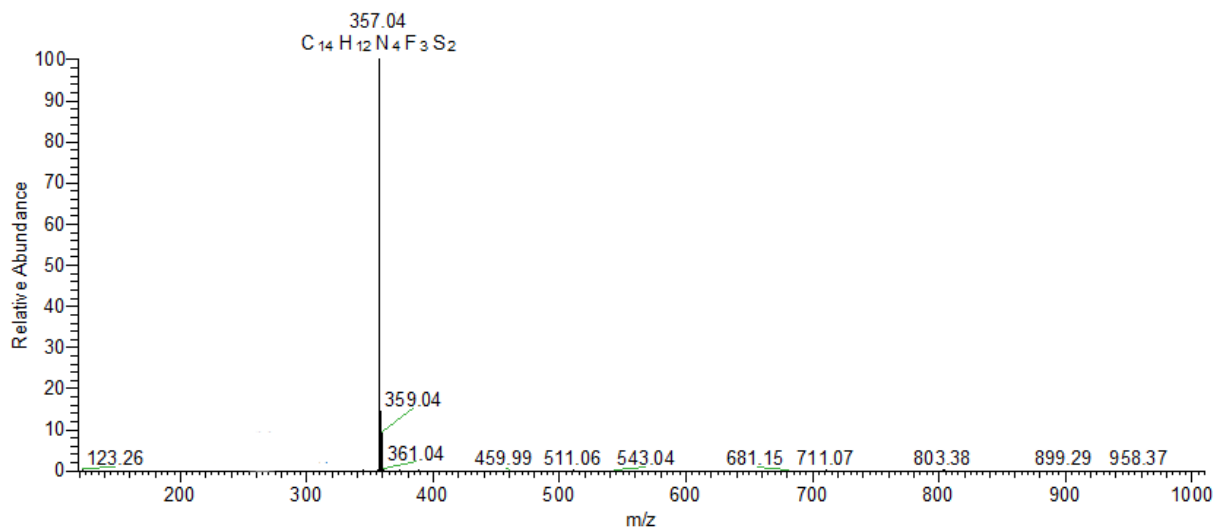

**Spectrum 32:** HR-ESI-MS spectrum of aminothiazole **10**.

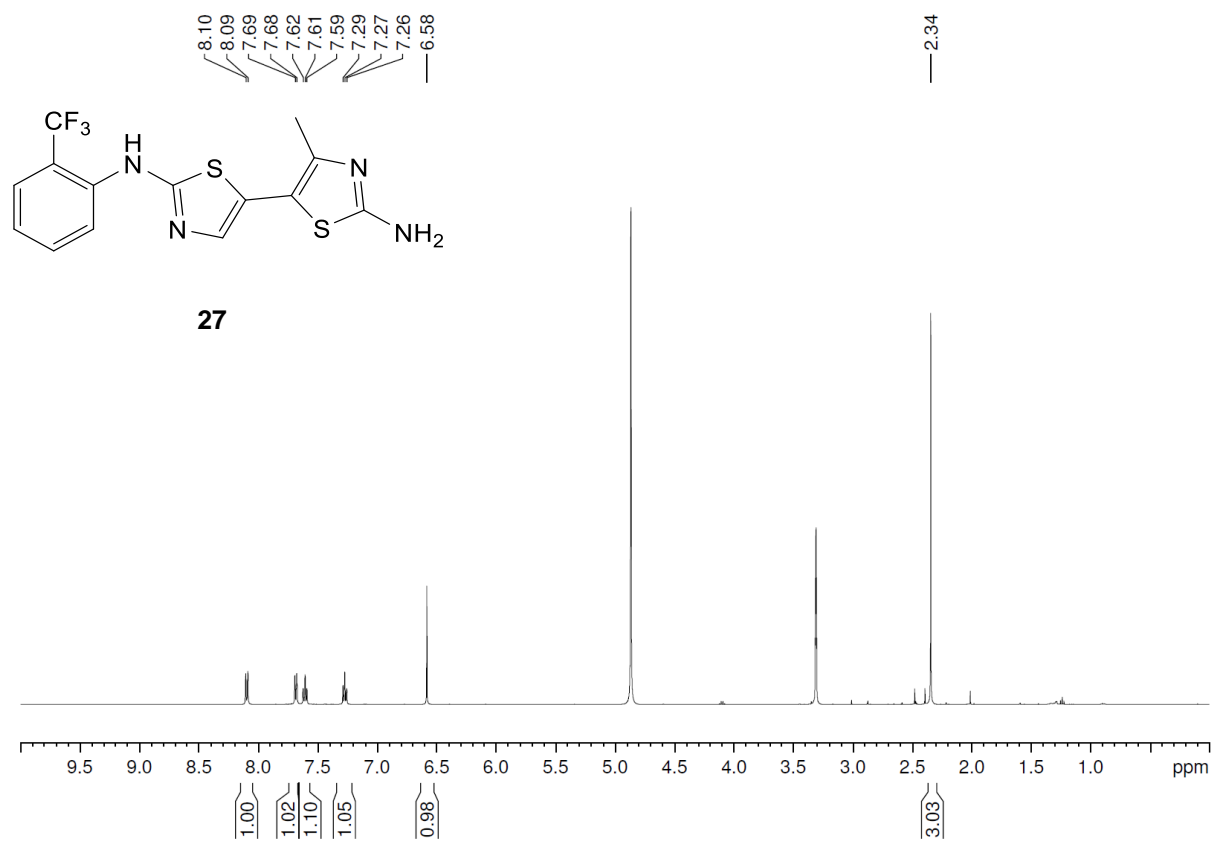

**Spectrum 33:** <sup>1</sup>H NMR of aminothiazole **27**.

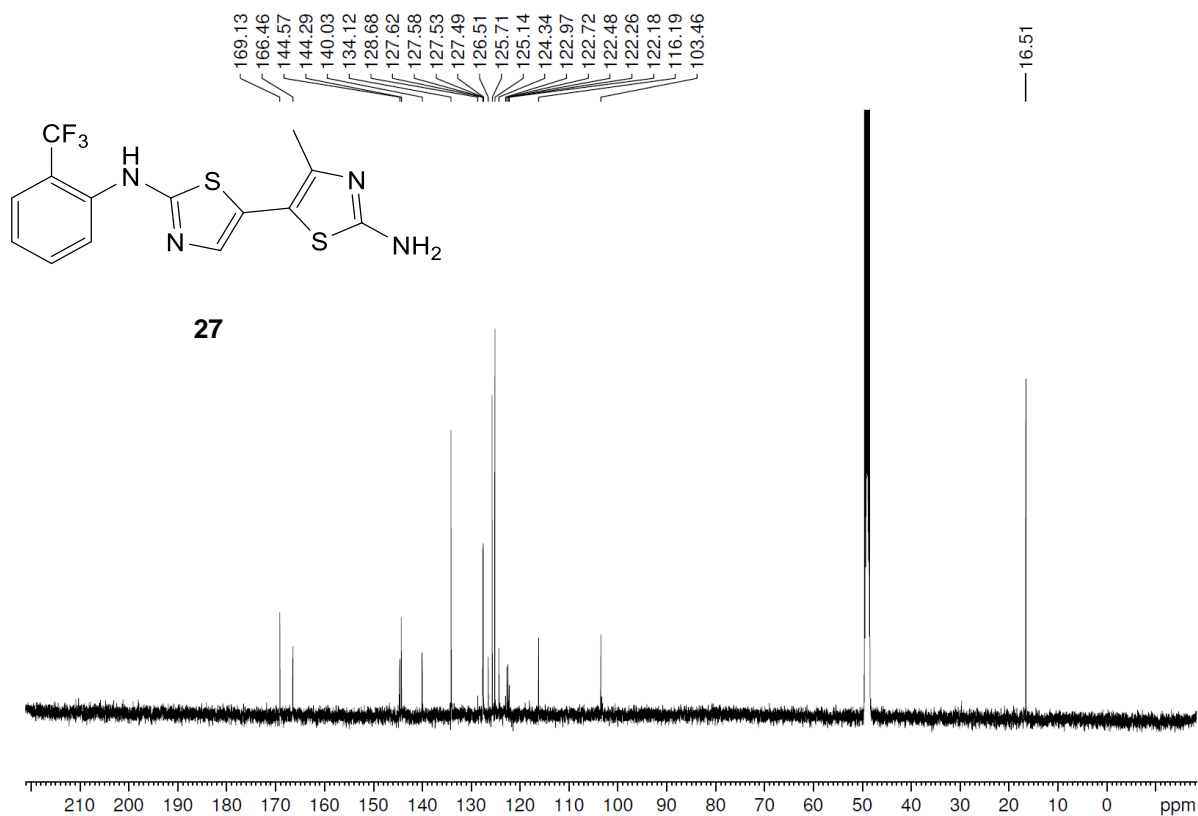

**Spectrum 34:**  $^{13}\text{C}$  NMR of aminothiazole **27**.

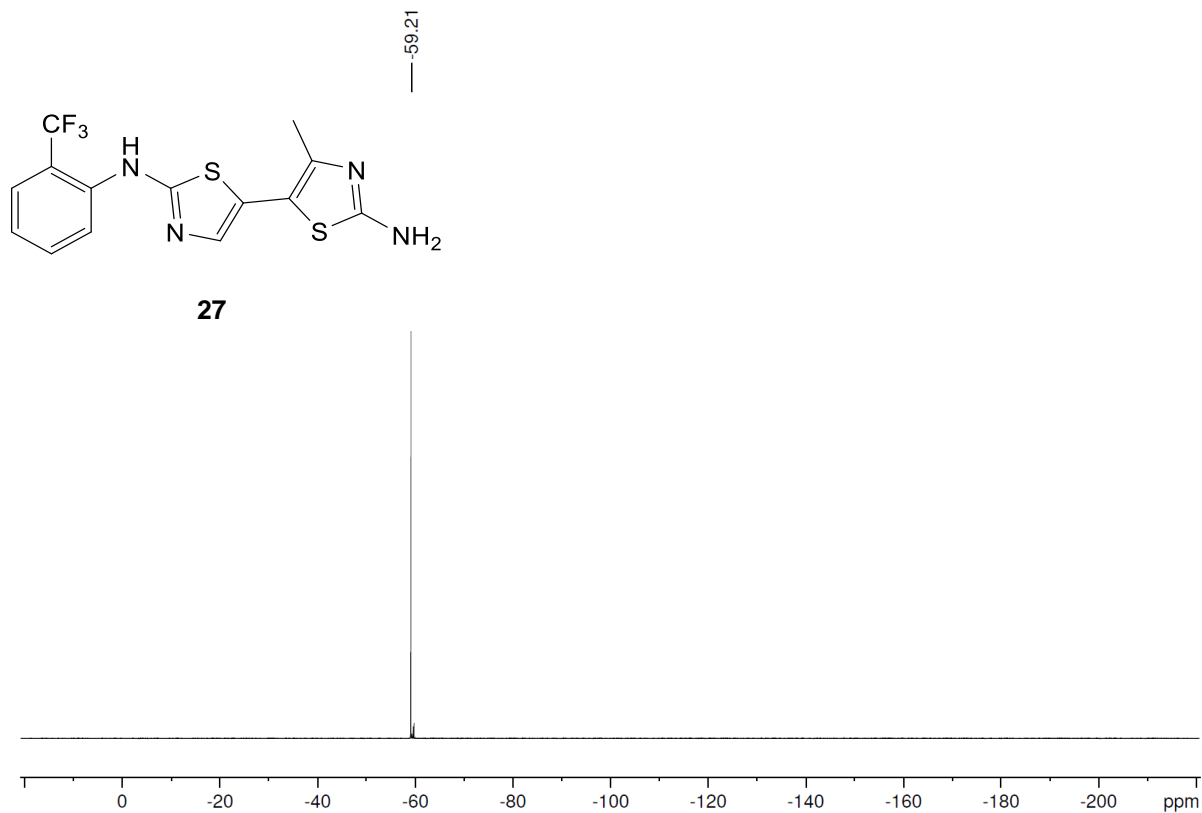

**Spectrum 35:**  $^{19}\text{F}$  NMR of aminothiazole **27**.

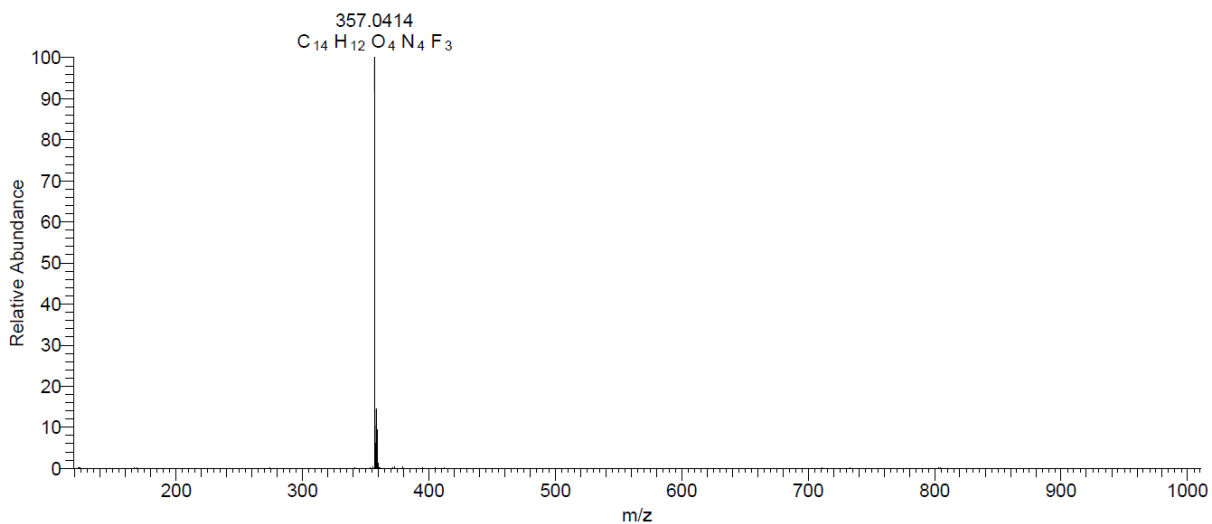

**Spectrum 36:** HR-ESI-MS spectrum of aminothiazole **27**.

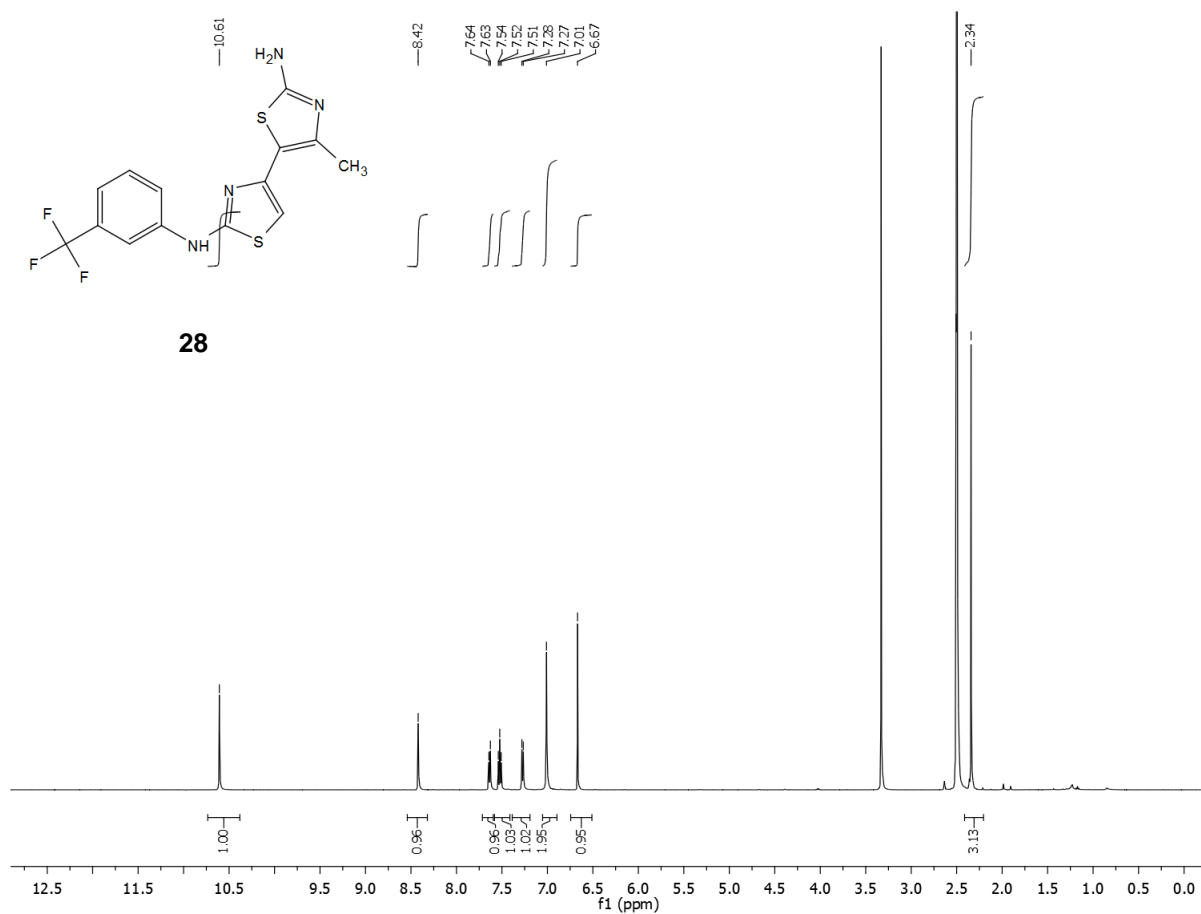

**Spectrum 37:** <sup>1</sup>H NMR of aminothiazole **28**.

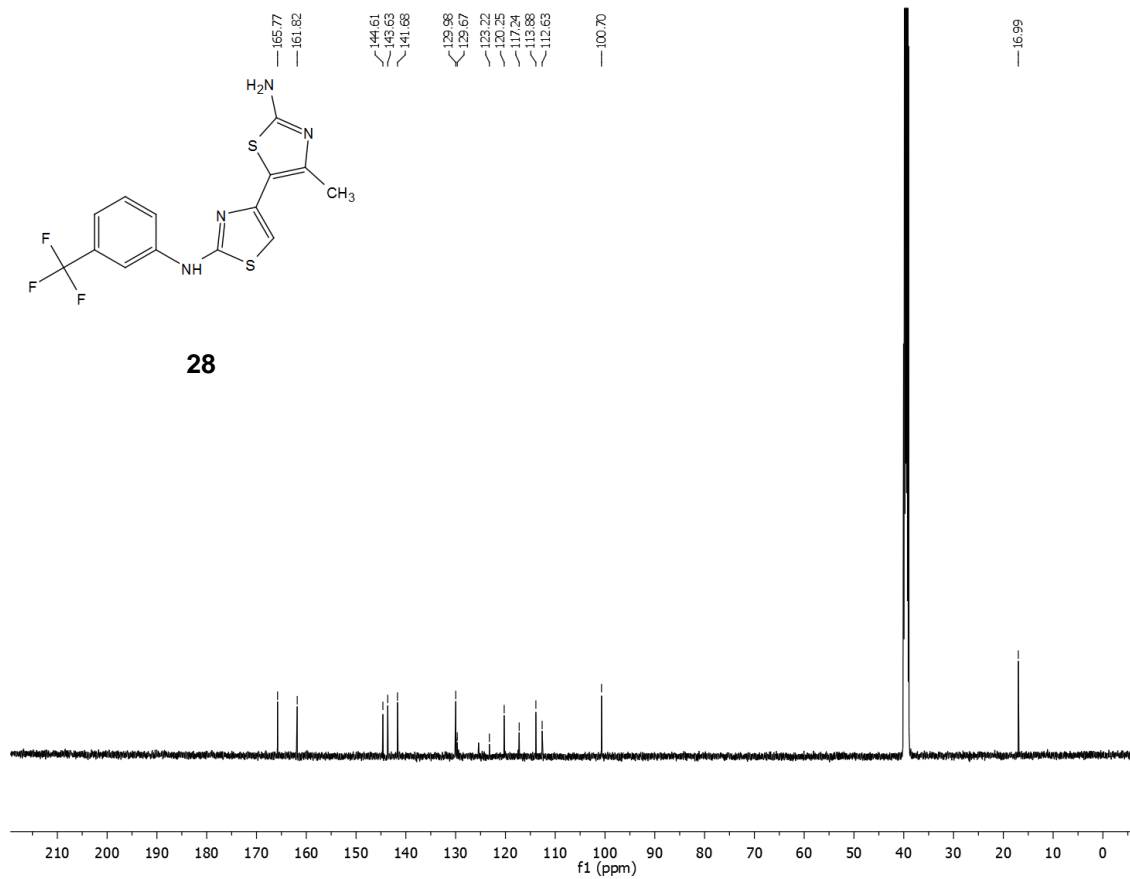

**Spectrum 38:**  $^{13}\text{C}$  NMR of aminothiazole **28**.

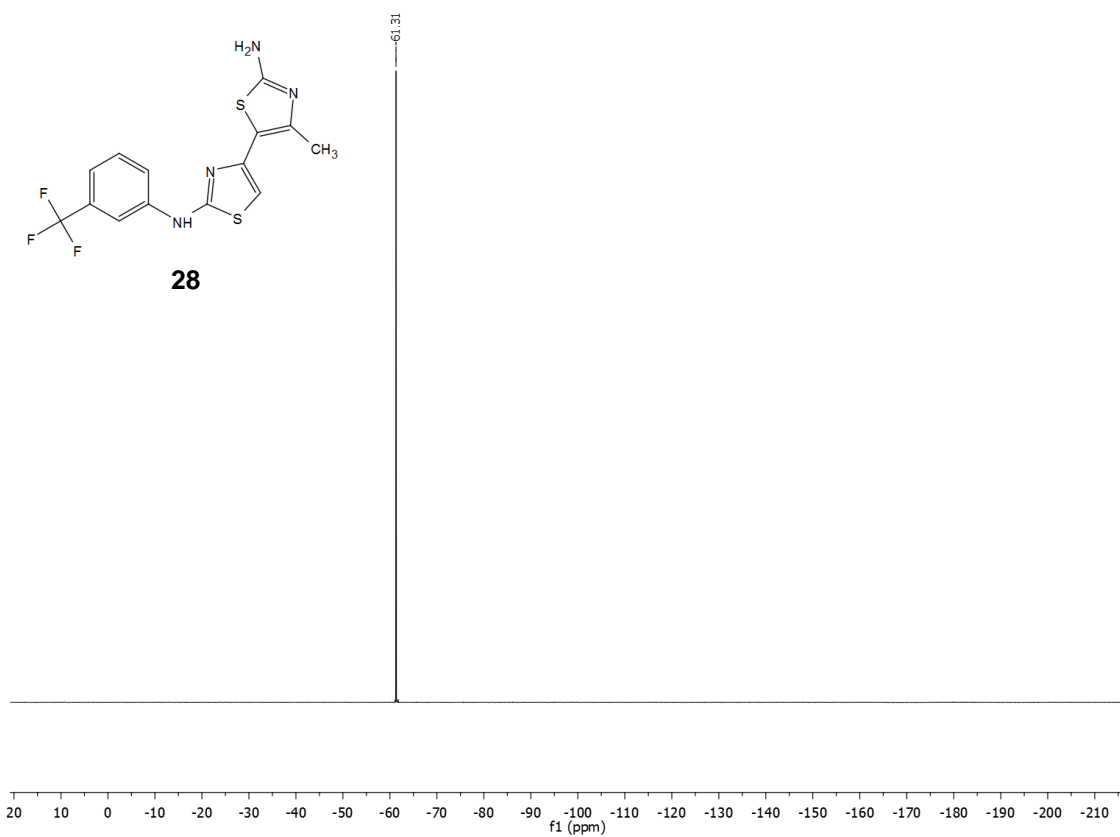

**Spectrum 39:**  $^{19}\text{F}$  NMR of aminothiazole **28**.

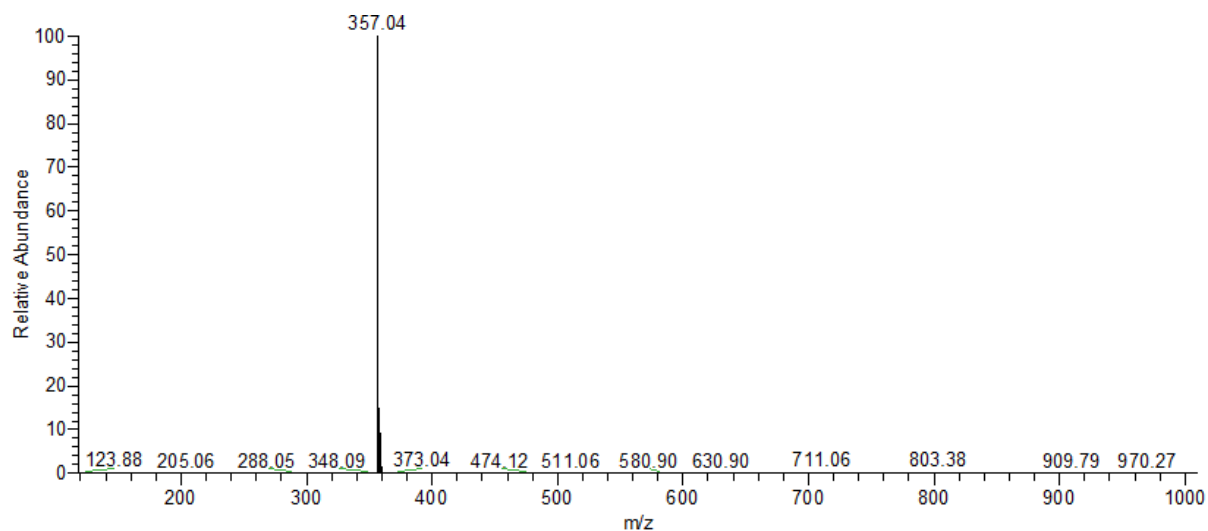

**Spectrum 40:** HR-ESI-MS spectrum of aminothiazole **28**.

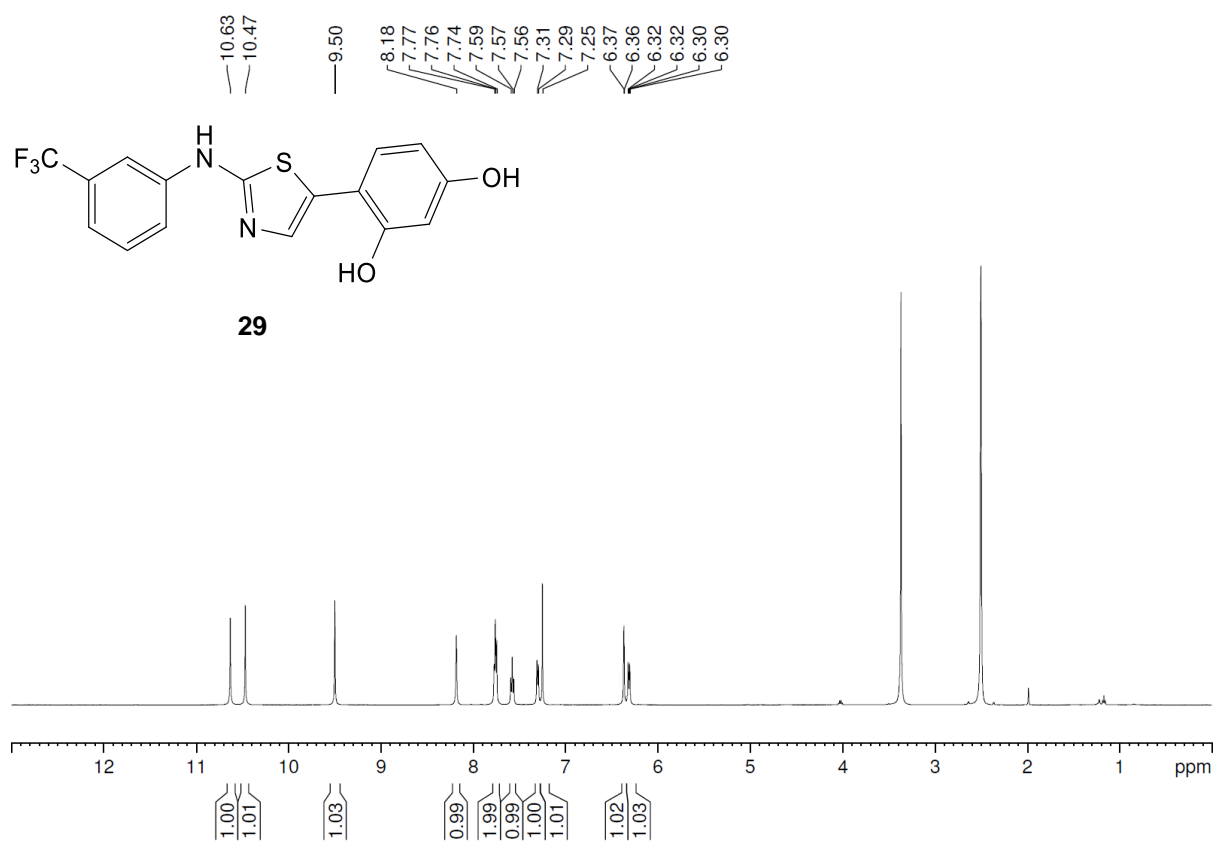

**Spectrum 41:** <sup>1</sup>H NMR of aminothiazole **29**.

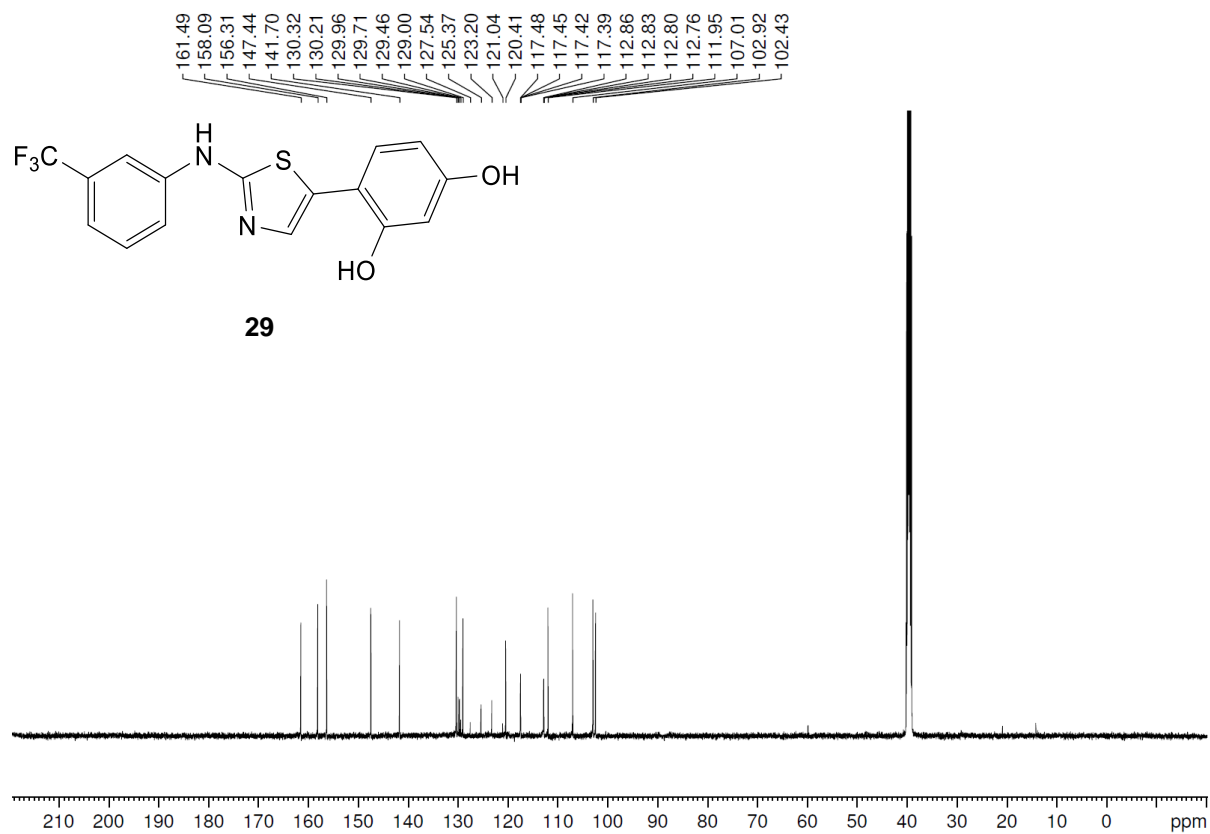

**Spectrum 42:**  $^{13}\text{C}$  NMR of aminothiazole **29**.

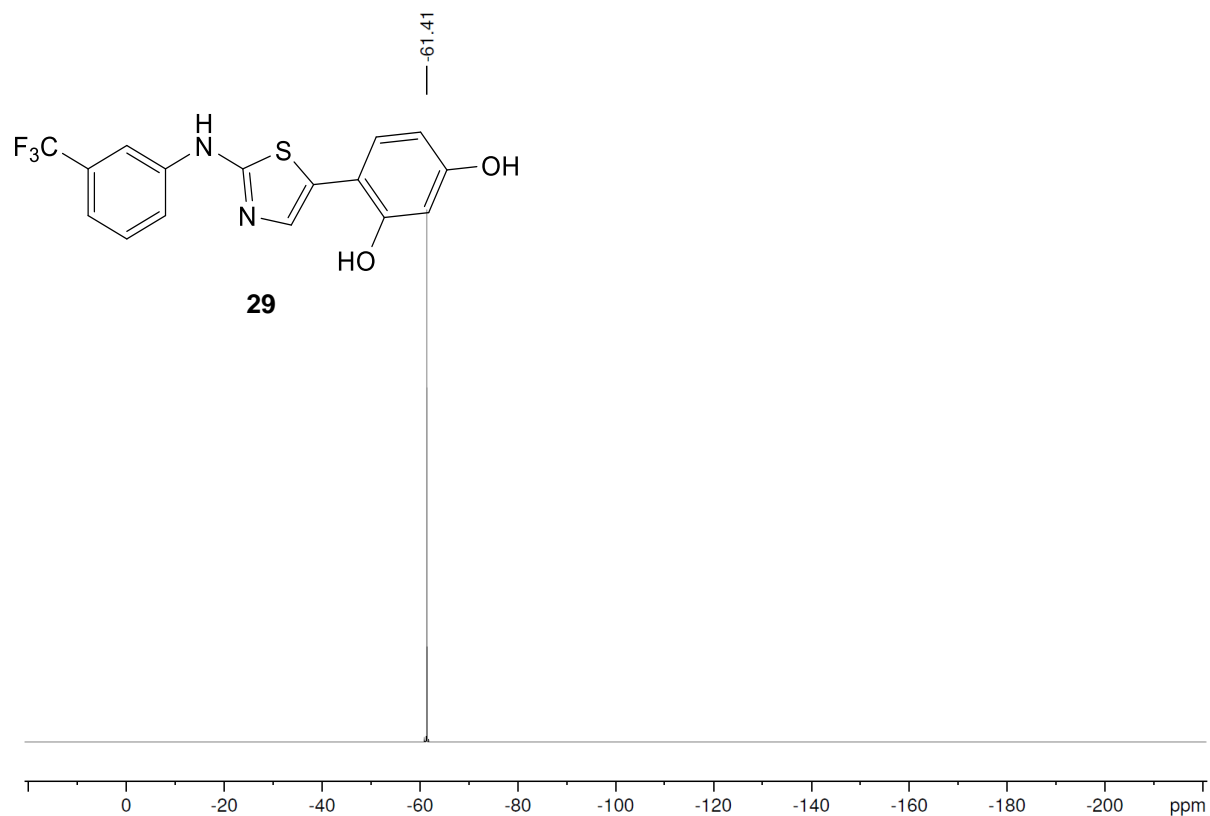

**Spectrum 43:**  $^{19}\text{F}$  NMR of aminothiazole **29**.

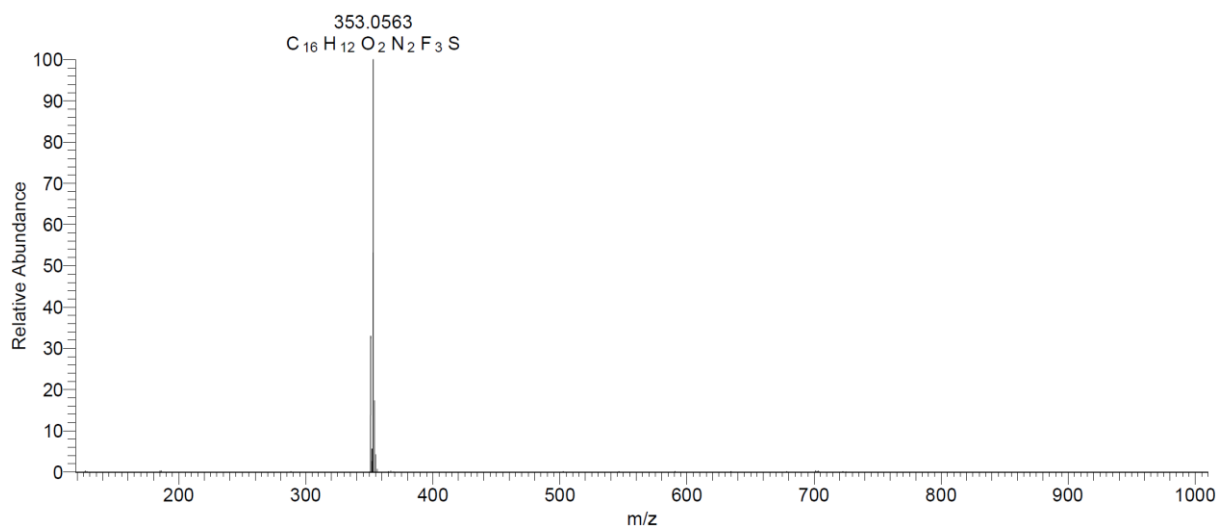

**Spectrum 44:** HR-ESI-MS spectrum of aminothiazole **29**.

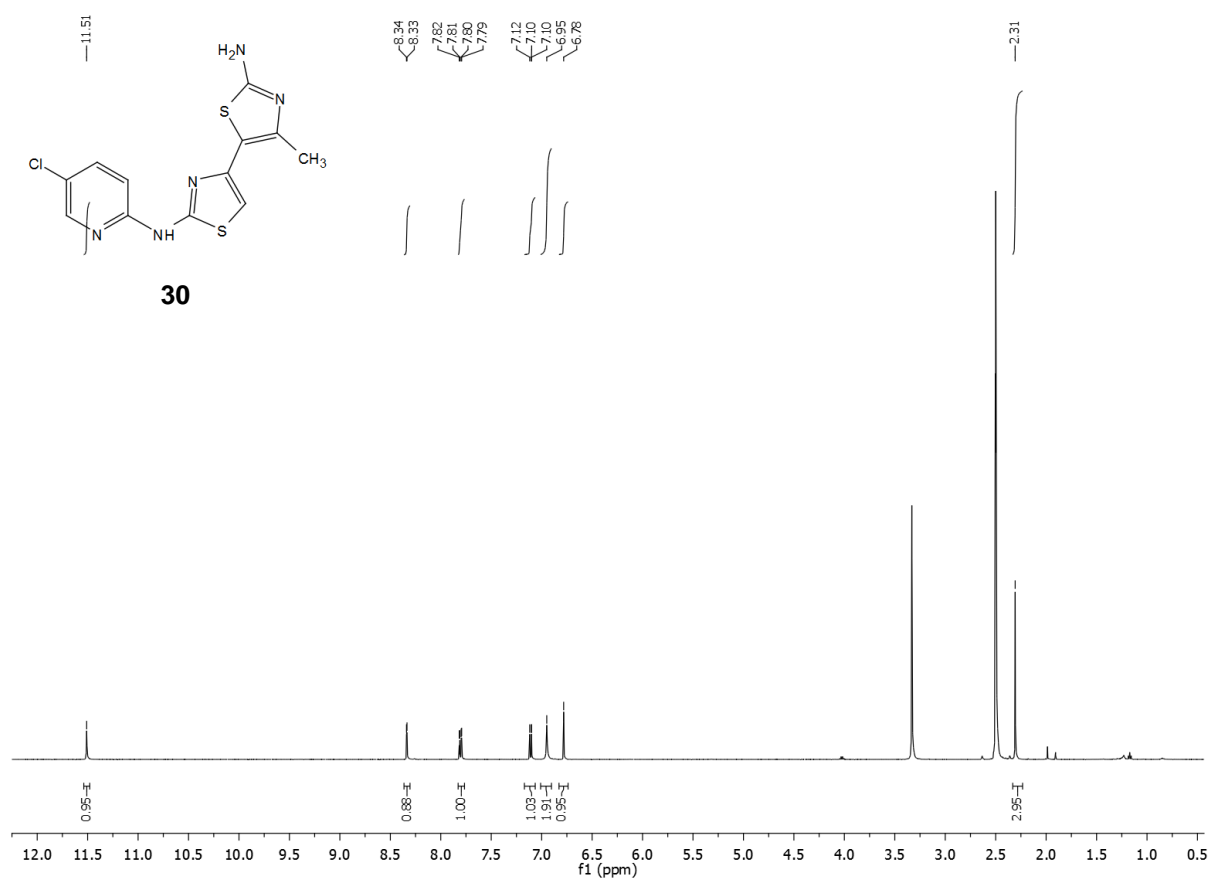

**Spectrum 45:** <sup>1</sup>H NMR of aminothiazole **30**.

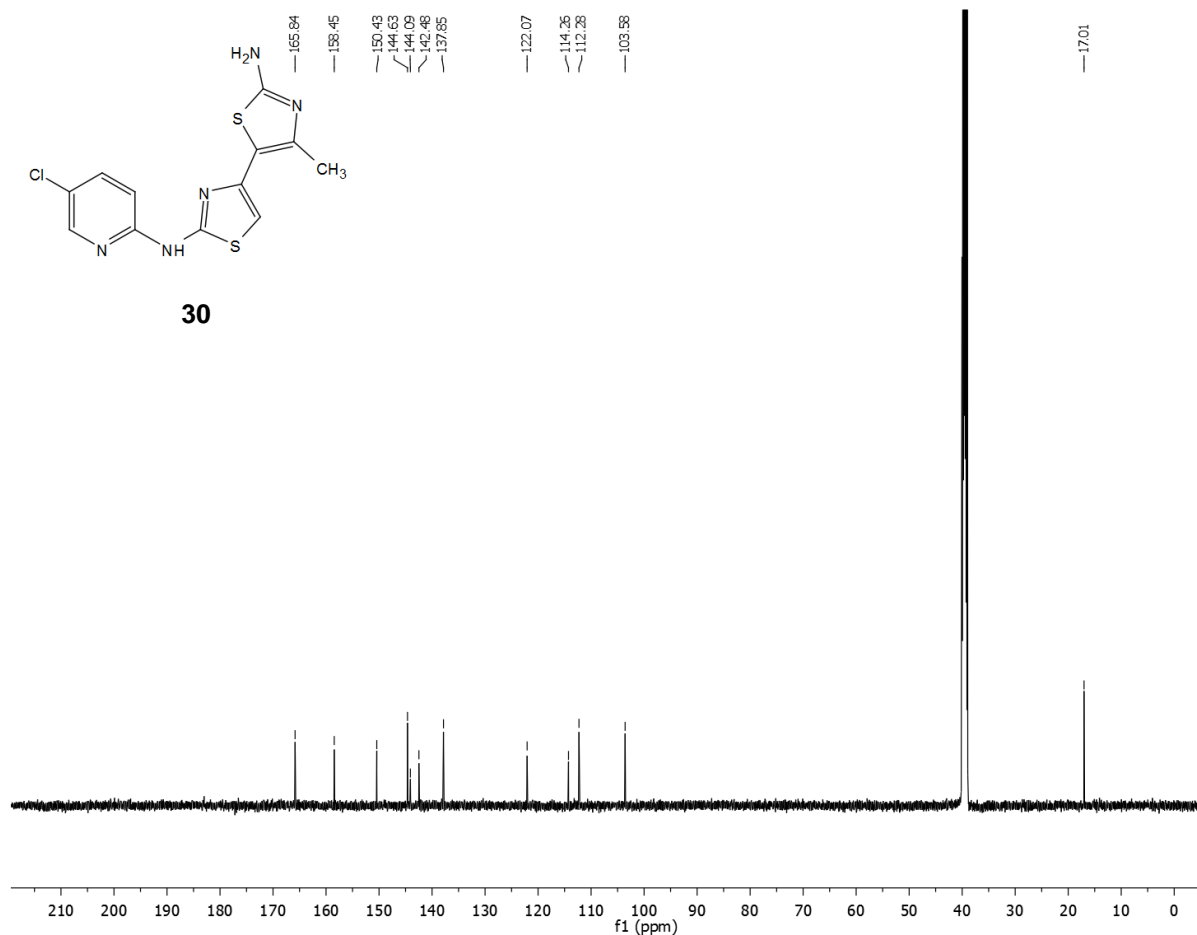

**Spectrum 46:**  $^{13}\text{C}$  NMR of aminothiazole **30**.

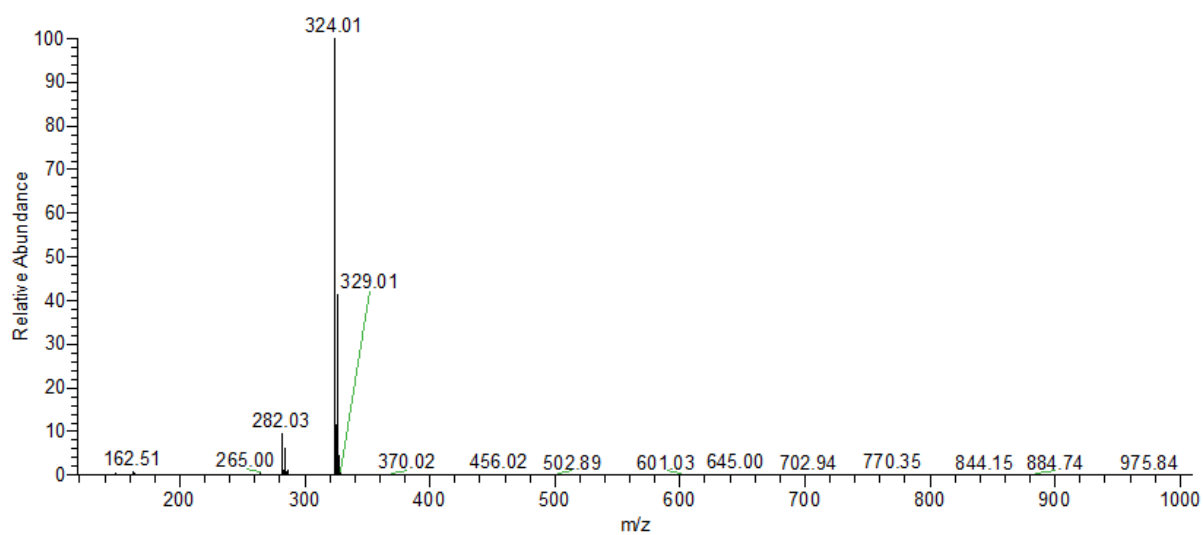

**Spectrum 47:** HR-ESI-MS spectrum of aminothiazole **30**.
