# Supplementary material for: Discovery of novel drug-like antitubercular hits targeting the MEP pathway enzyme DXPS by strategic application of ligand-based virtual screening
Source: Royal Society of Chemistry journal article supplement (doi:10.1039/d2sc02371g), 2022-01-01
Supplement: d2sc02371g4.pdf [file d2sc02371g4.pdf]

# Supplementary Tables

**Table S1:** Structures, SMILES codes and supplier ID of hits from the first round of LBVS.

| Cmpd. No. | Structure, SMILES and supplier ID                                                                                                                                   | MW     | cLogP | IC <sub>50</sub> (μM) |
|-----------|---------------------------------------------------------------------------------------------------------------------------------------------------------------------|--------|-------|-----------------------|
|           | 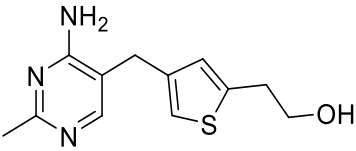 <p>DZT</p>                                                                        |        |       |                       |
| 11        |  <p>OCCNC1=C(\C=C2/SC(=S)N(C3CCCCC3)C2=O)C(=O)N2C=CC=CC2=N1</p> <p>OSSK_026083</p> | 430.54 | 2.37  | 60 ± 5                |
| 12        |  <p>NC1=NC(C2=CC=C(C=C2Cl)Cl)N3C(N1)=NC4=CC=CC=C34</p> <p>OSSK_676817</p>        | 332.19 | 4.45  | 145 ± 17              |
| 32        |  <p>SC1=NN=C(C2=CSC3=C2CCCC3)N1</p> <p>OSSK_626533</p>                           | 237.34 | 3.06  | 528 ± 118             |

|    |                                                                                                                                                           |        |      |                                 |
|----|-----------------------------------------------------------------------------------------------------------------------------------------------------------|--------|------|---------------------------------|
| 33 | 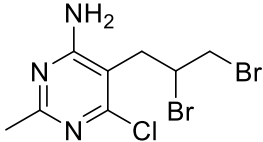<br><chem>CC1=NC(N)=C(C(Cl)=N1)CC(CBr)Br</chem><br>OSSL_119803           | 343.45 | 3.09 | 748 ± 131                       |
| 34 | <br><chem>CN1N=C2C(N=CN(C2=O)CC3=CC=C(C=C3)Cl)=C1C</chem><br>OSSL_160939 | 288.74 | 2.29 | ~ 1000                          |
| 35 | <br><chem>CNC1=C(C(Cl)=NC(C)=N1)CC(CBr)Br</chem><br>OSSK_356137         | 357.47 | 3.43 | ~ 40% inhibition<br>at 1000 µM  |
| 36 | <br><chem>CC1CC(C)=CC(C1/C=N/N2C=NN=C2)C</chem><br>OSSK_356851         | 218.30 | 0.87 | ~ 30 % inhibition<br>at 1000 µM |
| 37 | <br><chem>CSC1=CC=C(C2N=C(NC3=NC4=C(N23)C=CC=C4)N)C=C1</chem>          | 309.39 | 3.87 | >60                             |

OSSK\_676806

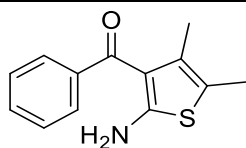

38

231.31

4.36

> 120

CC1=C(C(C(C2=CC=CC=C2)=O)=C(S1)  
N)C

OSSK\_998770

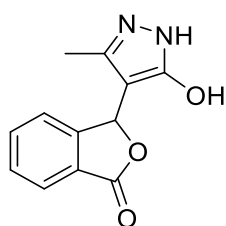

39

230.22

1.53

> 1000

CC1=NNC(O)=C1C2OC(C3=CC=CC=C2  
3)=O

OSSK\_734675

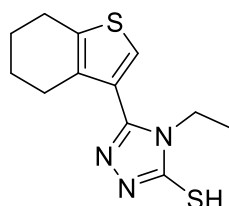

40

265.39

3.64

> 240

CCN1C(S)=NN=C1C2=CSC3=C2CCCC3

OSSK\_040776

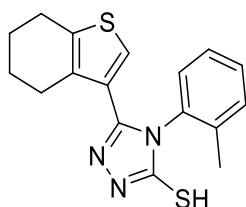

41

327.46

5.46

> 8

CC1=CC=CC=C1N2C(S)=NN=C2C3=CS  
C4=C3CCCC4

OSSK\_041451

|    |                                                                         |        |      |        |
|----|-------------------------------------------------------------------------|--------|------|--------|
| 42 |                                                                         | 392.32 | 3.18 | > 30   |
|    | <chem>CC1=NN(C(C)=C1Br)CCC2=NN=C(N2C<br/>C3=CC=CC=C3)S</chem>           |        |      |        |
|    | OSSK_041558                                                             |        |      |        |
| 43 |                                                                         | 318.31 | 2.72 | > 500  |
|    | <chem>OC1=NC=NC(O)=C1C(C2=C(N=CN=C2<br/>O)O)C3=CC=CS3</chem>            |        |      |        |
|    | OSSK_373400                                                             |        |      |        |
| 44 |                                                                         | 246.31 | 1.05 | > 1000 |
|    | <chem>CC1=CC=CC(C(N2CCC(C(N)=O)CC2)=O<br/>)=C1</chem>                   |        |      |        |
|    | OSSK_389140                                                             |        |      |        |
| 45 |                                                                         | 351.45 | 6.60 | > 15   |
|    | <chem>CC1=C(C(NC2=CC=CC=C2)=NC(C3=CC<br/>=CC=C3)=N1)CC4=CC=CC=C4</chem> |        |      |        |
|    | OSSK_468268                                                             |        |      |        |

|    |                                                                                     |        |      |        |
|----|-------------------------------------------------------------------------------------|--------|------|--------|
| 46 |                                                                                     | 332.37 | 2.74 | > 500  |
|    | <chem>COC1=CC=C2NC=C(C2=C1)C3NC(N)=N<br/>C4=NC5=C(N34)C=CC=C5</chem><br>OSSK_531783 |        |      |        |
| 47 |                                                                                     | 360.46 | 4.94 | >30    |
|    | <chem>CC(C1=CC=C(C=C1)CN(C2=CC=CC=N2)<br/>)C(COC3=CC=CC=C3)=O</chem><br>OSSK_771297 |        |      |        |
| 48 |                                                                                     | 313.33 | 3.62 | > 500  |
|    | <chem>OC(CCC1=CC=C(C2=CC=C(C=C2)F)N1<br/>CC3=CC=CO3)=O</chem><br>OSSK_995312        |        |      |        |
| 49 |                                                                                     | 267.29 | 2.06 | > 1000 |
|    | <chem>CC1=CC=C(C2NC(N)=NC3=NC4=C(N23)<br/>C=CC=C4)O1</chem><br>OSSL_009157          |        |      |        |

| 50       |                                                                | 373.82 | 2.73  | > 240                 |
|----------|----------------------------------------------------------------|--------|-------|-----------------------|
|          | <chem>COC1=CC(OC)=C(C(Cl)=C1)/C=C2SC(N(C\2=O)CC(O)=O)=S</chem> |        |       |                       |
|          | OSSL_122234                                                    |        |       |                       |
| 51       |                                                                | 246.29 | 1.22  | > 1000                |
|          | <chem>NN1C(S)=NN=C1CN2C=NC3=CC=CC=C23</chem>                   |        |       |                       |
|          | OSSL_259003                                                    |        |       |                       |
| 52       |                                                                | 271.38 | 3.22  | > 240                 |
|          | <chem>CCNC(NC1=CC=C(C=C1)CC2=CC=NC=C2)=S</chem>                |        |       |                       |
|          | OSSL_301953                                                    |        |       |                       |
|          |                                                                |        |       |                       |
|          | 1                                                              |        |       |                       |
| Cmpd No. | Structure, SMILES and supplier ID                              | MW     | cLogP | IC <sub>50</sub> (μM) |
| 3        |                                                                | 294.40 | 4.00  | 317 ± 29              |
|          | <chem>CC(C)C1=CC=C(C=C1)CN2C(CCO)=NC3=CC=CC=C23</chem>         |        |       |                       |
|          | OSSK_927261                                                    |        |       |                       |

|                  |                                                                                                                                                                      |        |      |                                 |
|------------------|----------------------------------------------------------------------------------------------------------------------------------------------------------------------|--------|------|---------------------------------|
| <p><b>4</b></p>  | 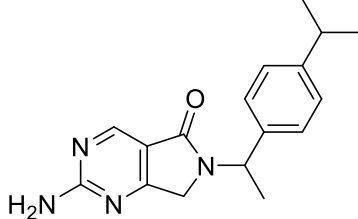 <p><chem>CC(C1=CC=C(C(N2CC3=C(C2=O)C=NC(N)=N3)C=C1)C</chem></p> <p>OSSL_332078</p> | 296.37 | 2.42 | 935 ± 117                       |
| <p><b>53</b></p> |  <p><chem>OC(CC1=CC=C(N2C=NN=N2)C=C1)=O</chem></p> <p>OSSL_014662</p>               | 204.19 | 0.65 | ~ 25 % inhibition<br>at 1000 µM |
| <p><b>54</b></p> |  <p><chem>SC1=NC=CN1CC2=CC=CC=C2</chem></p> <p>OSSL_312724</p>                     | 190.26 | 2.47 | > 500                           |
| <p><b>55</b></p> |  <p><chem>CC1=CC(C(O)=O)=C(C2=CC=CC=C2)O1</chem></p> <p>OSSL_295114</p>           | 202.21 | 2.54 | > 1000                          |
| <p><b>56</b></p> |  <p><chem>O=C1NC(C2=CC=CC=C2)C(N1)=O</chem></p> <p>OSSL_299665</p>                | 176.18 | 0.49 | > 1000                          |

|    |                                                                                                                                                                      |        |       |        |
|----|----------------------------------------------------------------------------------------------------------------------------------------------------------------------|--------|-------|--------|
| 57 | 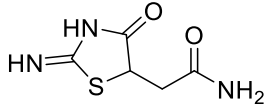<br><chem>NC(CC1SC(NC1=O)=N)=O</chem><br>OSSK_303386                                | 173.19 | -1.15 | > 1000 |
| 58 | <br><chem>CN(CC1=CC=C(C=C1)O)C</chem><br>OSSK_366315                                | 151.21 | 1.61  | > 1000 |
| 59 | <br><chem>CCOC1=CC(/C=C2NC(N(C/2=O)CC=C)=O)=CC=C1O</chem><br>OSSK_441886            | 288.30 | 1.53  | > 30   |
| 60 | <br><chem>OC1=CC=C(C=C1I)/C=C2NC(N(C3=CC=C(C=C3)Cl)C/2=O)=O</chem><br>OSSK_441901 | 440.62 | 3.79  | > 120  |
| 61 | <br><chem>OCC1=C(C2=NC3=CC=CC=C3S2)N=CC=C1</chem><br>OSSK_470489                  | 242.30 | 2.54  | > 60   |



|                  |                                                                                                                                                                  |        |       |        |
|------------------|------------------------------------------------------------------------------------------------------------------------------------------------------------------|--------|-------|--------|
| <p><b>62</b></p> | 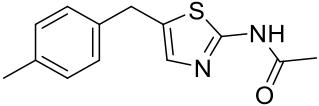 <p><chem>CC(=O)NC1=NC=C(S1)CC2=CC=C(C=C2)C</chem></p> <p>OSSK_475789</p>       | 246.33 | 3.29  | > 30   |
| <p><b>63</b></p> |  <p><chem>COC1=CC=C(C(C2CC(=O)NCC2)C(=O)O)=C1OC</chem></p> <p>OSSK_614781</p>   | 301.34 | 1.13  | > 500  |
| <p><b>64</b></p> |  <p><chem>CC(C)(O)CNCC1=CC=CS1</chem></p> <p>OSSK_616553</p>                  | 185.29 | 1.45  | > 1000 |
| <p><b>65</b></p> |  <p><chem>OC1=NC2=C(C(N1CC3=CN=CC=C3)=O)N=CC=C2</chem></p> <p>OSSK_840158</p> | 254.25 | 1.30  | >240   |
| <p><b>66</b></p> |  <p><chem>COCC(=O)N(C)CC1=CN(N=C1C)C</chem></p> <p>OSSK_891366</p>            | 211.27 | -0.47 | >1000  |

|    |                                                                              |        |      |        |
|----|------------------------------------------------------------------------------|--------|------|--------|
| 67 |                                                                              | 221.30 | 1.07 | >1000  |
|    | <chem>CCN1N=CC=C1CN(C(C2CCCC2)=O)C</chem><br>OSSK_891525                     |        |      |        |
| 68 |                                                                              | 233.27 | 1.25 | > 1000 |
|    | <chem>CN1C(C2=CC=CC=C2)C(C(O)=O)CCC1=O</chem><br>OSSL_107834                 |        |      |        |
| 69 |                                                                              | 266.39 | 1.47 | > 1000 |
|    | <chem>CCCCNC(N(CC1=C(N(N=C1C)CC)C)C)=O</chem><br>OSSL_161624                 |        |      |        |
| 70 |                                                                              | 203.25 | 0.82 | > 1000 |
|    | <chem>COC1=CC=C(C=C1N)CN2C=CN=C2</chem><br>OSSL_303243                       |        |      |        |
| 71 |                                                                              | 354.45 | 3.77 | > 60   |
|    | <chem>CCC1CCC2(N=C(N(C2=O)CC(C3=CC=C4CCCC4=C3)=O)O)CC1</chem><br>OSSL_309452 |        |      |        |

|    |                                                                             |        |       |        |
|----|-----------------------------------------------------------------------------|--------|-------|--------|
| 72 |                                                                             | 378.29 | 3.65  | > 120  |
|    | <chem>CC1=CC(C)=NN1CCC2=NN=C(N2C3=C<br/>C=C(C=C3)Br)S</chem><br>OSSL_311660 |        |       |        |
| 73 |                                                                             | 313.42 | 3.40  | > 500  |
|    | <chem>CC1=CC(C)=NN1CCC2=NN=C(N2C3=C<br/>C=C(C=C3)C)S</chem><br>OSSL_311662  |        |       |        |
| 74 |                                                                             | 192.22 | -0.25 | > 1000 |
|    | <chem>CC1=CC(C)=NN1CCC2=NN=CO2</chem><br>OSSL_311751                        |        |       |        |
| 75 |                                                                             | 253.31 | 2.38  | > 1000 |
|    | <chem>NC(C1=NC2=CC=CC=C2N1)CC3=CC=C<br/>(C=C3)O</chem><br>OSSL_317110       |        |       |        |
|    |                                                                             |        |       |        |
|    | 2                                                                           |        |       |        |

| Cmpd. No. | Structure, SMILES and supplier ID                                                                                                                      | MW     | cLogP | IC <sub>50</sub> (μM)           |
|-----------|--------------------------------------------------------------------------------------------------------------------------------------------------------|--------|-------|---------------------------------|
| 5         | 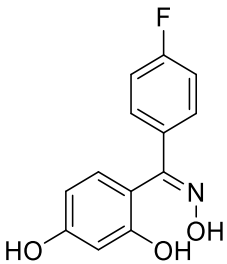<br><chem>O/N=C(C1=CC=C(C=C1O)O)/C2=CC=C(C=C2)F</chem><br>OSSL_151911 | 247.23 | 2.98  | 528 ± 43                        |
| 6         | <br><chem>O/N=C/C1=CC=CN1C2=CC=CC(C(=O)O)=C2</chem><br>OSSK_600760    | 230.22 | 2.23  | 455 ± 81                        |
| 76        | <br><chem>CC1=CSC(CCC2=NC(C)=CS2)=N1</chem><br>OSSK_269157          | 224.34 | 1.82  | ~ 25 % inhibition<br>at 1000 μM |
| 77        | <br><chem>COC1=CC(S(=O)(N(CCO)CCO)=O)=CC=C1Cl</chem><br>OSSL_292991 | 309.76 | 0.09  | ~ 25 % inhibition<br>at 2000 μM |
| 78        | <br><chem>Nc1nnn(CNc2ccccc2)c1C(=O)N</chem>                         | 217.23 | 0.89  | > 240                           |

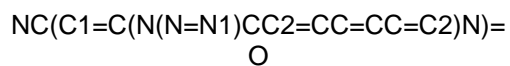

OSSL\_296278

79

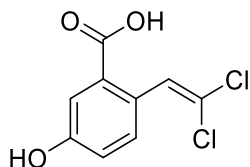

233.04

2.82

> 1000

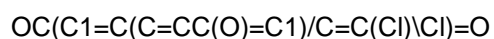

OSSL\_304940

80

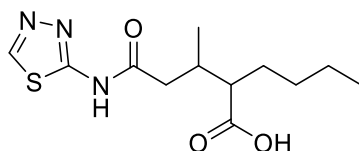

285.36

2.10

> 1000

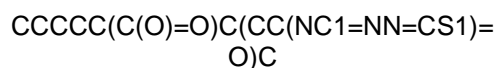

OSSK\_308957

81

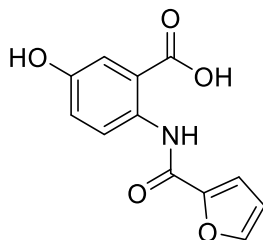

247.21

2.13

>60

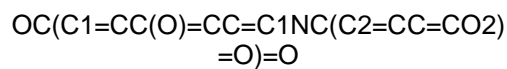

OSSK\_403603

82

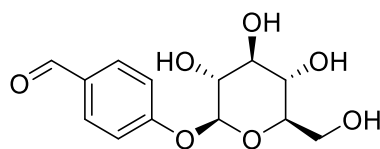

284.26

-0.89

> 1000

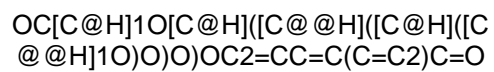

OSSK\_404842

|                  |                                                                                                                                                                                      |               |              |                  |
|------------------|--------------------------------------------------------------------------------------------------------------------------------------------------------------------------------------|---------------|--------------|------------------|
| <p><b>83</b></p> | 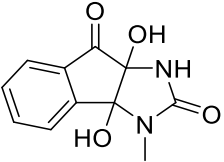 <p><chem>CN1C(NC2(C(C3=CC=CC=C3C12O)=O)O)=O</chem></p> <p>OSSK_451422</p>                          | <p>234.21</p> | <p>0.16</p>  | <p>&gt; 1000</p> |
| <p><b>84</b></p> |  <p><chem>CN1N(C2=CC=CC=C2)C(C(N=C3C(N(C4=CC=CC=C4)CC(O)=O)=O)=C1C)=O</chem></p> <p>OSSK_488329</p> | <p>390.40</p> | <p>1.49</p>  | <p>&gt; 120</p>  |
| <p><b>85</b></p> |  <p><chem>CN1NC(C2=CC=C(C=C2)O)C3C1C(NC3=O)=O</chem></p> <p>OSSK_645367</p>                       | <p>247.25</p> | <p>-0.57</p> | <p>&gt; 120</p>  |
| <p><b>86</b></p> |  <p><chem>CC1=CC=C(C(NC2=CC=C(C=C2C(O)=O)O)=O)C=C1</chem></p> <p>OSSK_706039</p>                  | <p>271.27</p> | <p>3.58</p>  | <p>&gt; 120</p>  |

|                  |                                                                                                                                                                                       |               |             |                 |
|------------------|---------------------------------------------------------------------------------------------------------------------------------------------------------------------------------------|---------------|-------------|-----------------|
| <p><b>87</b></p> | 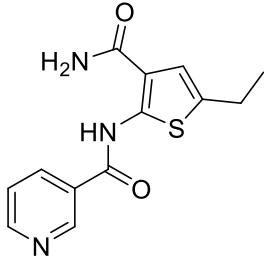 <p> <chem>CCC1=CC(C(N)=O)=C(S1)NC(C2=CC=CN=C2)=O</chem><br/> OSSK_807467 </p>                       | <p>275.33</p> | <p>2.38</p> | <p>&gt; 60</p>  |
| <p><b>88</b></p> |  <p> <chem>COC1=CC(/C=C2C(=O)Nc3ccc(Br)cc32)=CC(OC)=C1O</chem><br/> OSSL_267571 </p>                 | <p>376.21</p> | <p>3.42</p> | <p>&gt; 120</p> |
| <p><b>89</b></p> |  <p> <chem>CCCSC1=NC(O)=C(C2=CC=CC=C2NC(=O)N=N1)</chem><br/> OSSL_268532 </p>                      | <p>304.37</p> | <p>2.13</p> | <p>&gt; 120</p> |
| <p><b>90</b></p> |  <p> <chem>CCCCC(C(O)=O)NS(=O)(=O)(C1=CC2=C3N(C(C=C(C3=C1)C)=O)CC2)=O</chem><br/> OSSL_304616 </p> | <p>378.44</p> | <p>2.09</p> | <p>&gt; 60</p>  |

|           |                                             |        |      |        |
|-----------|---------------------------------------------|--------|------|--------|
| <b>91</b> |                                             | 213.34 | 2.45 | > 1000 |
|           | <chem>NC1=CC=C(C2=CC=CC=C2C(O)=O)C=C</chem> |        |      |        |
|           | OSSL_312689                                 |        |      |        |
| <b>92</b> |                                             | 250.28 | 1.96 | > 60   |
|           | <chem>COC1=CC(/C=N/N2C=NN=C2S)=CC=C1</chem> |        |      |        |
|           | OSSK_001945                                 |        |      |        |



**Table S2:** Structures, SMILES codes and supplier ID of hits from the second round of LBVS.

| Cmpd. No. | Structure, SMILES and supplier ID                                                                                                                                                                                                              | MW     | cLogP | IC <sub>50</sub> (μM) |
|-----------|------------------------------------------------------------------------------------------------------------------------------------------------------------------------------------------------------------------------------------------------|--------|-------|-----------------------|
|           | 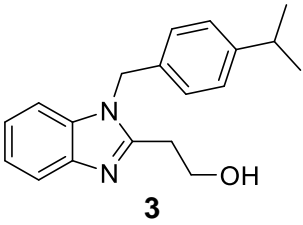 <p style="text-align: center;"><b>3</b></p>                                                                                                                  |        |       |                       |
| <b>7</b>  |  <p style="text-align: center;"> <chem>OCC1=CN(CC2=CC=C(Cl)C(Cl)=C2)C3=C1C=CC=C3</chem><br/>                     OSSL_652383                 </p>             | 306.19 | 4.46  | 34 ± 4                |
| <b>93</b> |  <p style="text-align: center;"> <chem>OC(CO)CN1C(CC2=CC=C(C3=CC=CC=C3)C=C2)=NC4=CC=CC=C41</chem><br/>                     OSSK_769093                 </p> | 358.44 | 3.77  | 381 ± 122             |
| <b>94</b> |  <p style="text-align: center;"> <chem>OCCC1=NC2=CC=CC=C2N1CC3=C(Cl)C=CC=C3Cl</chem><br/>                     OSSK_932460                 </p>              | 321.20 | 3.96  | 465 ± 167             |

|                  |                                                                                                                                                       |               |             |                   |
|------------------|-------------------------------------------------------------------------------------------------------------------------------------------------------|---------------|-------------|-------------------|
| <p><b>95</b></p> | 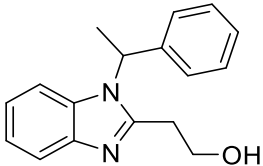 <p>OCCC1=NC2=CC=CC=C2N1C(C)C3=CC=CC=C3</p> <p>OSSK_286476</p>       | <p>266.34</p> | <p>3.17</p> | <p>720 ± 252</p>  |
| <p><b>96</b></p> |  <p>OCCC1=NC2=CC=CC=C2N1CC3=C(F)C=CC=C3Cl</p> <p>OSSK_932461</p>     | <p>304.75</p> | <p>3.50</p> | <p>900 ± 390</p>  |
| <p><b>97</b></p> |  <p>OC(C)C1=NC2=CC=CC=C2N1CC3=C(F)C=CC=C3Cl</p> <p>OSSK_464452</p> | <p>304.75</p> | <p>3.83</p> | <p>1100 ± 300</p> |
| <p><b>98</b></p> |  <p>OCCC1=NC2=CC=CC=C2N1CC3=CC=CC=C3</p> <p>OSSK_932458</p>        | <p>252.32</p> | <p>2.75</p> | <p>2900 ± 600</p> |
| <p><b>99</b></p> |                                                                    | <p>266.34</p> | <p>3.26</p> | <p>&gt; 500</p>   |

OCCC1=NC2=CC=CC=C2N1CC3=CC=C  
C=C3C

OSSK\_927258

100

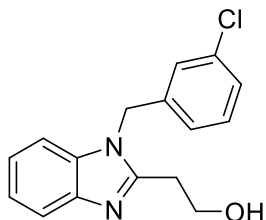

286.76

3.35

> 236

OCCC1=NC2=CC=CC=C2N1CC3=CC=C  
C(Cl)=C3

OSSK\_927259

101

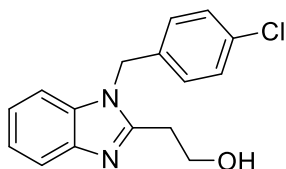

286.76

3.35

> 440

OCCC1=NC2=CC=CC=C2N1CC3=CC=C  
(Cl)C=C3

OSSK\_932459

102

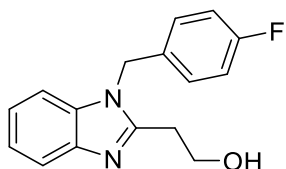

270.31

2.89

> 540

OCCC1=NC2=CC=CC=C2N1CC3=CC=C  
(F)C=C3

OSSK\_932462

103

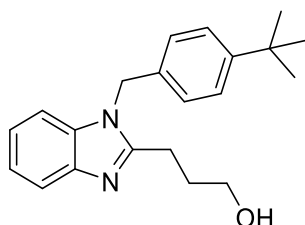

322.45

4.58

> 90

OCCCC1=NC2=CC=CC=C2N1CC3=CC=C  
C(C(C)(C)C)C=C3

OSSK\_286458

| <p><b>104</b></p> | 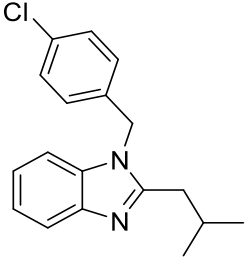 <p>CC(C)CC1=NC2=CC=CC=C2N1CC3=CC=C(C)C=C3</p> <p>OSSK_286117</p>        | <p>298.81</p> | <p>5.37</p> | <p>&gt; 63</p>        |
|-------------------|-----------------------------------------------------------------------------------------------------------------------------------------------------------|---------------|-------------|-----------------------|
| <p><b>105</b></p> |  <p>COC(C=C1)=CC=C1CC2=NC3=CC=CC=C3N2CC(O)CO</p> <p>OSSK_356610</p>     | <p>312.37</p> | <p>1.96</p> | <p>&gt; 2000</p>      |
|                   |  <p><b>4</b></p>                                                       |               |             |                       |
| Cmpd. No.         | Structure, SMILES and supplier ID                                                                                                                         | MW            | cLogP       | IC <sub>50</sub> (μM) |
| <p><b>8</b></p>   |  <p>CC1=C(NC2=NC(C3=C(C)N=C(C)S3)=CS2)C=CC=C1Cl</p> <p>OSSK_523229</p> | <p>335.87</p> | <p>4.82</p> | <p>92 ± 17</p>        |

| <p><b>106</b></p> | 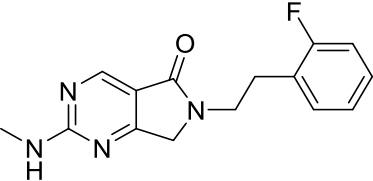 <p><chem>O=C1N(CCC2=CC=CC=C2F)CC3=NC(NC)=NC=C31</chem></p> <p>OSSL_317963</p>       | <p>286.31</p> | <p>1.49</p> | <p>&gt; 340</p>       |
|-------------------|-----------------------------------------------------------------------------------------------------------------------------------------------------------------------|---------------|-------------|-----------------------|
| <p><b>107</b></p> |  <p><chem>NC1=NC=C2C(CN(CC3=C(C(F)(F)F)C=C3)C2=O)=N1</chem></p> <p>OSSL_317988</p>   | <p>308.26</p> | <p>1.63</p> | <p>&gt; 380</p>       |
| <p><b>108</b></p> |  <p><chem>NC1=NC=C2C(CN(CC3=CC(OCO4)=C4C=C3)C2=O)=N1</chem></p> <p>OSSL_318222</p> | <p>284.28</p> | <p>0.38</p> | <p>&gt; 260</p>       |
|                   |  <p><b>5</b></p>                                                                   |               |             |                       |
| Cmpd. No.         | Structure, SMILES and supplier ID                                                                                                                                     | MW            | cLogP       | IC <sub>50</sub> (μM) |
| <p><b>9</b></p>   |                                                                                    | <p>277.70</p> | <p>3.37</p> | <p>44 ± 8</p>         |

OC1=CC=C(/C(CC2=CC=C(Cl)C=C2)=N/  
O)C(O)=C1

OSSK\_862931

109

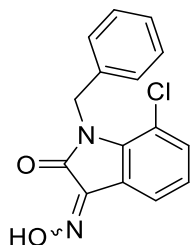

286.72

3.15

165 ± 21

O=C(/C1=NO)N(CC2=CC=CC=C2)C3=C  
1C=CC=C3Cl

OSSL\_327325

110

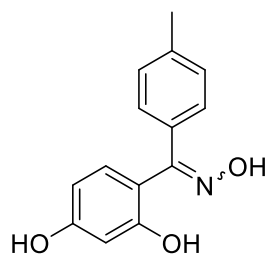

243.26

3.35

> 1000

O/N=C(C1=CC=C(C)C=C1)/C2=CC=C(O)  
C=C2O

OSSL\_151910

111

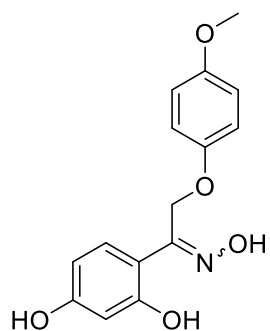

289.29

2.29

> 300

O/N=C(COC1=CC=C(OC)C=C1)/C2=CC  
=C(O)C=C2O

OSSL\_151915

|                   |                                                                                                                                                                      |               |             |                 |
|-------------------|----------------------------------------------------------------------------------------------------------------------------------------------------------------------|---------------|-------------|-----------------|
| <p><b>112</b></p> | 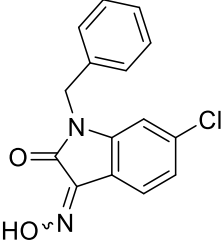 <p><chem>ClC1=CC(N(CC2=CC=CC=C2)C(=O)N)C=C1</chem></p> <p>OSSL_327230</p>          | <p>286.72</p> | <p>3.15</p> | <p>&gt; 900</p> |
| <p><b>113</b></p> |  <p><chem>O=C(/C1=NO)N(CC2=CC=CC=C2)C3=C1C(Cl)=CC=C3</chem></p> <p>OSSL_327325</p>  | <p>286.72</p> | <p>3.15</p> | <p>&gt; 30</p>  |
| <p><b>114</b></p> |  <p><chem>O=C(/C1=NO)N(CC2=CC=CC=C2)C3=C1C(C)=CC=C3</chem></p> <p>OSSL_328145</p> | <p>280.33</p> | <p>3.58</p> | <p>&gt; 60</p>  |
| <p><b>115</b></p> |  <p><chem>[O-]N=C(C1=CC=CC=C1)/C2=CC=CC=C2</chem></p> <p>OSSL_379701</p>          | <p>196.23</p> | <p>3.44</p> | <p>&gt; 500</p> |

| <p><b>116</b></p>                                                                                   | 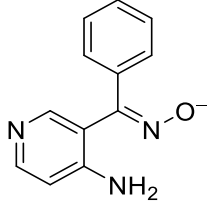 <p>[O-]/N=C(C1=CC=CC=C1)/C2=CN=CC=C<br/>2N<br/>OSSL_302816</p>              | <p>212.23</p> | <p>1.40</p> | <p>&gt; 2000</p>      |
|-----------------------------------------------------------------------------------------------------|---------------------------------------------------------------------------------------------------------------------------------------------------------------|---------------|-------------|-----------------------|
| <p><b>117</b></p>                                                                                   |  <p>[O-]/N=C(C1=NC=CC=C1)/C2=CC=CC=C<br/>2<br/>OSSL_750176</p>               | <p>197.22</p> | <p>2.61</p> | <p>&gt; 500</p>       |
|  <p><b>6</b></p> |                                                                                                                                                               |               |             |                       |
| Cmpd. No.                                                                                           | Structure, SMILES and supplier ID                                                                                                                             | MW            | cLogP       | IC <sub>50</sub> (μM) |
| <p><b>118</b></p>                                                                                   |  <p>CC1=C(/C=N/O)C=C(C)N1C2=C(C(O)=O)<br/>)C(C)=C(C)S2<br/>OSSK_632565</p> | <p>292.35</p> | <p>3.82</p> | <p>&gt; 800</p>       |
| <p><b>119</b></p>                                                                                   |                                                                            | <p>230.22</p> | <p>2.23</p> | <p>&gt; 500</p>       |



OC(C1=CC=C(N2C(/C=N/O)=CC=C2)C=C1)=O

OSSK\_632073

120

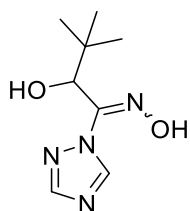

198.23

0.82

> 200

OC(C(C)(C)C)/C(N1C=NC=N1)=N/O

OSSL\_128671

121

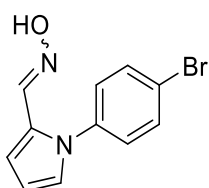

265.11

3.35

> 200

BrC1=CC=C(N2C(/C=N/O)=CC=C2)C=C1

OSSK\_777326

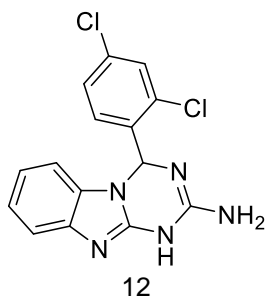

Cmpd. No.

Structure, SMILES and supplier ID

MW

cLogP

IC<sub>50</sub> (μM)

122

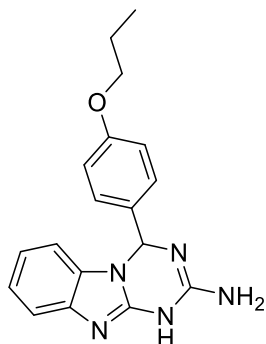

321.38

3.97

> 50

NC1=NC(C2=CC=C(OCCC)C=C2)N3C(N1)=NC4=CC=CC=C34

OSSK\_784042

123

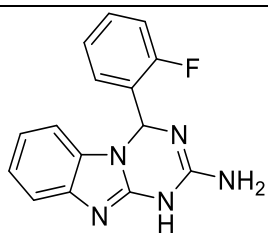

281.29

2.94

> 120

NC1=NC(C2=CC=CC=C2F)N3C(N1)=NC4=CC=CC=C34

OSSK\_676133

124

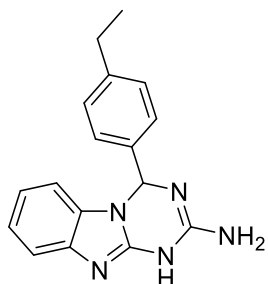

291.36

4.20

> 30

NC1=NC(C2=CC=C(CC)C=C2)N3C(N1)=NC4=CC=CC=C34

OSSK\_676805

125

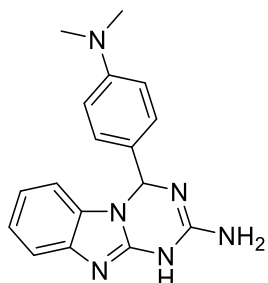

306.37

2.90

> 200

NC1=NC(C2=CC=C(N(C)C)C=C2)N3C(N1)=NC4=CC=CC=C34

OSSK\_676809

126

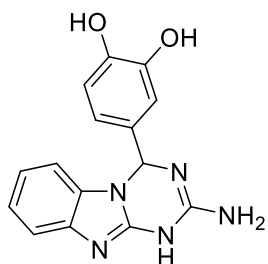

295.30

2.19

> 160

NC1=NC(C2=CC=C(O)C(O)=C2)N3C(N1)=NC4=CC=CC=C34

**Table S3:** Structures, SMILES codes and supplier ID of hits from the third round of LBVS.

| Cmpd. No. | Structure, SMILES and supplier ID                                                                                                                                                                                       | MW     | cLogP | IC <sub>50</sub> (μM) |
|-----------|-------------------------------------------------------------------------------------------------------------------------------------------------------------------------------------------------------------------------|--------|-------|-----------------------|
|           | 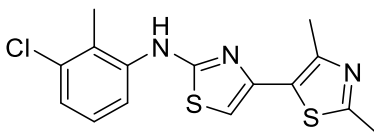 <p style="text-align: center;"><b>8</b></p>                                                                                           |        |       |                       |
| <b>10</b> |  <p style="text-align: center;"> <chem>CC1=C(SC(N)=N1)C2=CSC(NC3=CC=C(C(F)(F)F)C=C3)=N2</chem><br/>           OSSL_650294         </p> | 356.39 | 4.31  | 32 ± 3                |
| <b>26</b> |  <p style="text-align: center;"> <chem>CC1=C(SC(N)=N1)C2=CSC(NC3=CC=C(C=C3)=N2</chem><br/>           OSSK_672441         </p>        | 288.39 | 3.43  | > 120                 |
| <b>27</b> |  <p style="text-align: center;"> <chem>CC1=C(SC(N)=N1)C2=CSC(NC3=C(C(F)(F)F)C=CC3)=N2</chem><br/>           OSSL_648433         </p> | 356.39 | 4.31  | 45 ± 4                |
| <b>28</b> |                                                                                                                                      | 356.39 | 4.31  | 56 ± 9                |

|     |                                                                                                                                                                     |        |      |          |
|-----|---------------------------------------------------------------------------------------------------------------------------------------------------------------------|--------|------|----------|
|     | <chem>CC1=C(SC(N)=N1)C2=CSC(NC3=CC(C(F)(F)F)=CC=C3)=N2</chem><br>OSSK_523240                                                                                        |        |      |          |
| 29  | 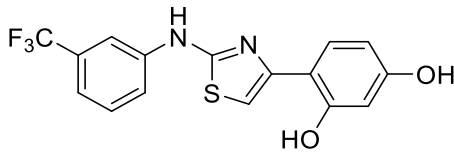<br><chem>OC(C=C(O)C=C1)=C1C2=CSC(NC3=CC(C(F)(F)F)=CC=C3)=N2</chem><br>OSSK_137545 | 352.33 | 5.06 | 48 ± 9   |
| 30  | <br><chem>CC1=C(SC(N)=N1)C2=CSC(NC3=NC=C(Cl)C=C3)=N2</chem><br>OSSL_648436         | 323.82 | 3.41 | 54 ± 7   |
| 31  | <br><chem>CC1=C(SC(C)=N1)C2=CSC(NC3=NC=C(Cl)C=C3)=N2</chem><br>OSSL_631964       | 322.83 | 3.68 | > 500    |
| 127 | <br><chem>FC1=C(NC2=NC(C3=CC=CC=N3)=CS2)C=CC=C1(F)F</chem><br>OSSL_648411        | 321.32 | 4.84 | 86 ± 5   |
| 128 | <br><chem>FC1=C(NC2=NC(C3=CC=CC=N3)=CS2)C=CC=C1</chem>                           | 271.31 | 4.10 | 100 ± 27 |

|             |                                                                                     |        |      |           |
|-------------|-------------------------------------------------------------------------------------|--------|------|-----------|
| OSSL_648413 |                                                                                     |        |      |           |
| <b>129</b>  | 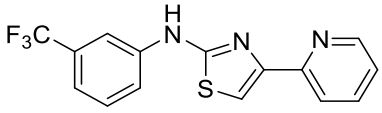   | 321.32 | 4.84 | 168 ± 18  |
|             | <chem>FC(C1=CC=CC(NC2=NC(C3=CC=CC=N3)=CS2)=C1)(F)F</chem>                           |        |      |           |
| OSSL_648412 |                                                                                     |        |      |           |
| <b>130</b>  |    | 367.46 | 2.04 | 315 ± 47  |
|             | <chem>CC1=C(SC(N)=N1)C2=CSC(NC3=CC=C(S(N)(=O)=O)C=C3)=N2</chem>                     |        |      |           |
| OSSK_320567 |                                                                                     |        |      |           |
| <b>131</b>  |   | 289.38 | 2.21 | 377 ± 102 |
|             | <chem>CC1=C(SC(N)=N1)C2=CSC(NC3=CN=C(C=C3)=N2</chem>                                |        |      |           |
| OSSL_648437 |                                                                                     |        |      |           |
| <b>132</b>  |  | 321.32 | 4.45 | > 60      |
|             | <chem>FC(C1=CC=C(NC2=NC(C3=CC=NC=C3)=CS2)C=C1)(F)F</chem>                           |        |      |           |
| OSSL_648422 |                                                                                     |        |      |           |
| <b>133</b>  |  | 460.49 | 6.23 | > 120     |
|             | <chem>CC1=C(SC(NC(C2=CC=CC=C2)=O)=N1)C3=CSC(NC4=CC=C(C(F)(F)F)C=C4)=N3</chem>       |        |      |           |
| OSSK_630272 |                                                                                     |        |      |           |

|                                                                                   |            |                                                         |        |      |       |
|-----------------------------------------------------------------------------------|------------|---------------------------------------------------------|--------|------|-------|
| 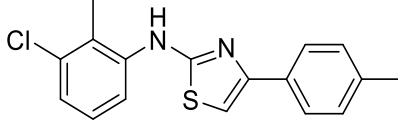 | <b>134</b> | <chem>CC1=C(NC2=NC(C3=CC=C(C)C=C3)=CS2)C=CC=C1Cl</chem> | 314.83 | 6.42 | > 16  |
| OSSL_960616                                                                       |            |                                                         |        |      |       |
|  | <b>135</b> | <chem>CC1=C(NC2=NC(C3=CC=CN=C3)=CS2)C=CC=C1Cl</chem>    | 301.79 | 4.69 | > 200 |
| OSSK_523203                                                                       |            |                                                         |        |      |       |

**Table S4:** Toxicity of **9** and **10** on zebrafish larvae.

| Cmpd. No. | Conc. [ $\mu\text{M}$ ] | 24 h (2 dpf) | 48 h (3 dpf) | 72 h (4 dpf) | 96 h (5 dpf) |
|-----------|-------------------------|--------------|--------------|--------------|--------------|
| <b>9</b>  | 100                     | 5            | 2            | 0            | 0            |
|           | 30                      | 10           | 10           | 10           | 10           |
|           | 10                      | 10           | 10           | 10           | 10           |
|           | 2                       | 10           | 10           | 10           | 10           |
| <b>10</b> | 100                     | 0            | 0            | 0            | 0            |
|           | 30                      | 2            | 0            | 0            | 0            |
|           | 10                      | 10           | 10           | 10           | 10           |
|           | 2                       | 10           | 10           | 10           | 10           |
| DMSO      | 1 %                     | 10           | 10           | 10           | 10           |
| Danieau's | -                       | 10           | 10           | 10           | 10           |

Fish line: TLF. Incubation with compounds started at 1 dpf. Visual screening (microscopy) daily until 5 dpf. 10 larvae per condition. The number of living zebrafish larvae is given. Dpf, days post fertilization.

**Table S5:** MIC values for final hits against *E. coli* TolC strain.

| Cmpd. No.                             | <b>7</b>       | <b>9</b>       | <b>10</b>      |
|---------------------------------------|----------------|----------------|----------------|
| <b>MIC [<math>\mu\text{M}</math>]</b> | $22.0 \pm 1.0$ | $21.9 \pm 1.3$ | $22.2 \pm 3.1$ |

**Table S6:** Frequency-of-resistance development of **10** and selected antibiotics (rifampicin, chloramphenicol and ciprofloxacin) at 4x and 2x MIC.

| Cmpd.      | 4x MIC             | 2x MIC           |
|------------|--------------------|------------------|
| <b>10</b>  | $< 8.7 * 10^{-10}$ | $3.3 * 10^{-9}$  |
| <b>Rif</b> | $1.7 * 10^{-9}$    | $3.8 * 10^{-9}$  |
| <b>Cam</b> | $< 8.7 * 10^{-10}$ | $2.9 * 10^{-10}$ |
| <b>Cip</b> | $1.7 * 10^{-9}$    | $7.5 * 10^{-9}$  |

Rif, Rifampicin; Cam, Chloramphenicol; Cip, Ciprofloxacin.
